# Supplementary material
Source: publisher figshare collection journal article supplement (https://acs.figshare.com/ndownloader/files/5959068)
Supplement: Supplementary file 1 [file 5959068]

Insertion Reactions of Silacyclopropanes: Evidence for a Radical-Based Mechanism

Christina Z Rotsides and K. A. Woerpel\*

Department of Chemistry, New York University, New York, New York, 10003, United States

**Supporting Information**

**Contents:**

|      |                                                                      |    |
|------|----------------------------------------------------------------------|----|
| I.   | General Procedures.....                                              | S2 |
| II.  | Preparation of Starting Materials.....                               | S3 |
| III. | Stereochemical Proof.....                                            | S7 |
| IV.  | References.....                                                      | S8 |
| V.   | <sup>1</sup> H and <sup>13</sup> C NMR Spectra of New Compounds..... | S9 |

## I. General Procedures

$^1\text{H}$  NMR and  $^{13}\text{C}$  NMR spectra were recorded at ambient temperature using Bruker AV-400 (400 and 100 MHz, respectively), AVIII-400 (400 and 100 MHz, respectively), AV-500 (500 and 125 MHz, respectively) or AVIII-600 (600 and 150 MHz, respectively) spectrometers, as indicated.  $^{29}\text{Si}$  NMR spectra were recorded at ambient temperature using a Bruker AVIII-400 (79 MHz) spectrometer. The data are reported as follows: chemical shift in ppm from internal tetramethylsilane or referenced to residual solvent ( $^1\text{H}$  NMR:  $\text{C}_6\text{D}_6$   $\delta$  7.16;  $\text{CDCl}_3$  7.26.  $^{13}\text{C}$  NMR:  $\text{C}_6\text{D}_6$   $\delta$  128.4;  $\text{CDCl}_3$   $\delta$  77.2.  $^{29}\text{Si}$  NMR: referenced to external tetramethylsilane  $\text{C}_6\text{D}_6$   $\delta$  0;  $\text{CDCl}_3$   $\delta$  0.) on the  $\delta$  scale, multiplicity (appar = apparent, br = broad, s = singlet, d = doublet, t = triplet, q = quartet, m = multiplet), coupling constants (Hz), and integration. Due to difficulties with purification for certain products, only distinctive peaks are listed in tabulated  $^1\text{H}$  NMR and  $^{13}\text{C}$  NMR spectral data as indicated.  $^1\text{H}$  and  $^{13}\text{C}$  peaks were assigned using a combination of COSY, NOE, HSQC, DEPT, and HMBC experiments. Multiplicity of carbon peaks was determined using a combination of HSQC and DEPT experiments.  $^1\text{H}$  NMR yields were determined relative to a known concentration of internal standard, mesitylene, using a single scan. Infrared (IR) spectra were obtained using a Thermo Nicolet *AVATAR* 360 FT-IR 5000 spectrometer using either attenuated total reflectance (ATR) or a thin film on a salt plate, as indicated. High-resolution mass spectra (HRMS) were acquired on an Agilent 6224 Accurate-Mass time-of-flight spectrometer and were obtained by peak matching. Microanalyses were performed by Atlantic Microlab Inc., Norcross, GA. Melting points were reported uncorrected. Analytical thin layer chromatography was performed on Silicycle silica gel 60 Å  $\text{F}_{254}$  plates. Liquid chromatography was performed using forced flow (flash chromatography) of the indicated solvent system on Silicycle silica gel ( $\text{SiO}_2$ ) 60 (230-400 mesh). Methylene chloride,

hexanes, diethyl ether, benzene, and triethylamine were dried by filtration through alumina according to the method of Grubbs.<sup>1</sup> C<sub>6</sub>D<sub>6</sub> was dried over 3 Å molecular sieves for 48 h and degassed prior to use. Dimethyl sulfoxide was distilled over CaH<sub>2</sub>. All reactions were run under an atmosphere of nitrogen in glassware that was flame-dried under a stream of nitrogen unless otherwise stated. Silacyclopropanes were stored and manipulated in a Vacuum Atmospheres nitrogen-atmosphere drybox. Benzaldehyde was distilled prior to use. Enone **S6**, enone **39**, 1,4-benzoquinone **11**, and 2,6-dichlorobenzoquinone **15** are commercially available and were used as received. Cyclohexene silacyclopropane **13**,<sup>2</sup> cis-silacyclopropane **10**,<sup>3</sup> trans-silacyclopropane **10**,<sup>3</sup> 1,1-dimethyl-di-*tert*-butylsilacyclopropane **20**,<sup>4</sup> diene **S3**,<sup>5</sup> alkene **S4**,<sup>6</sup> and alkene **S5**<sup>7,8</sup> were synthesized by known methods.

## II. Substrate Synthesis

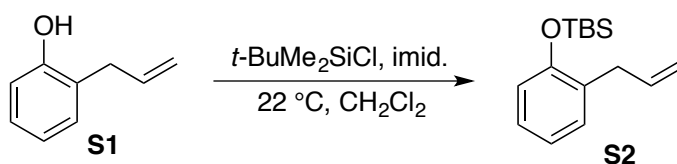

**(2-Allylphenoxy)(*tert*-butyl)dimethylsilane S2.** To a solution of 2-allylphenol (1.3 mL, 10 mmol) in methylene chloride (20 mL) were added imidazole (2.1 g, 31 mmol) and *t*-BuMe<sub>2</sub>SiCl (2.3 g, 15 mmol). After stirring at room temperature overnight (12 h), saturated aqueous NH<sub>4</sub>Cl (15 mL) and H<sub>2</sub>O (10 mL) were added. The layers were separated and the aqueous layer was extracted with CH<sub>2</sub>Cl<sub>2</sub> (3 x 5 mL). The combined organic layers were washed with H<sub>2</sub>O (15 mL) and brine (20 mL), dried over Na<sub>2</sub>SO<sub>4</sub>, and concentrated *in vacuo*. Purification by flash chromatography (hexanes) provided protected allyl phenol **S2** as a colorless oil (2.5 g, 99%). The spectral data are consistent with the data reported:<sup>9</sup> <sup>1</sup>H NMR (600 MHz, CDCl<sub>3</sub>) δ 7.16 (dd, *J* = 7.5, 1.6, 1H), 7.11 (td, *J* = 7.7, 1.7, 1H), 6.92 (td, *J* = 7.4, 1.1, 1H), 6.82 (dd, *J* = 8.0, 1.0,

1H), 6.03–5.97 (m, 1H), 5.08 (br s, 1H), 5.06–5.04 (m, 1H), 3.41–3.39 (m, 2H), 1.04 (s, 9H), 0.26 (s, 6H); <sup>13</sup>C NMR (150 MHz, CDCl<sub>3</sub>) δ 153.5, 137.3, 130.9, 130.3, 127.2, 121.3, 118.6, 115.6, 34.6, 26.0, 18.5, –4.0; HRMS (TOF MS ES+) *m/z* calcd for C<sub>15</sub>H<sub>25</sub>OSi (M+H)<sup>+</sup> 249.1669, found 249.1662.

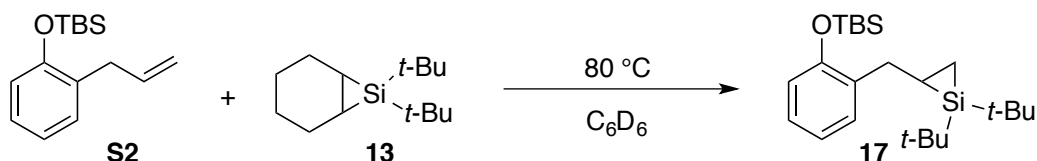

**Silacyclopropane 17.** To a solution of silyl-protected allylphenol **S2** (0.049 g, 0.20 mmol) in C<sub>6</sub>D<sub>6</sub> (0.59 mL) in a J. Young NMR tube were added a solution of cyclohexene silacyclopropane **13** (0.21 mL, 1.3 M in C<sub>6</sub>D<sub>6</sub>, 0.27 mmol) and mesitylene (0.0020 mL, 0.014 mmol, internal standard). The reaction mixture was heated to 80 °C for 8 h. Silacyclopropane **17** was formed in 98% based on comparison of the standard peak (δ 2.17) and the methylene protons of the unpurified reaction mixture: <sup>1</sup>H NMR (500 MHz, C<sub>6</sub>D<sub>6</sub>) δ 7.54 (dd, *J* = 7.4, 1.6, 1H), 7.07 (td, *J* = 7.6, 1.8, 1H), 7.01 (td, *J* = 7.4, 1.2, 1H), 6.85 (dd, *J* = 7.9, 1.1, 1H), 3.26 (dd, *J* = 15.8, 6.8, 1H), 3.07 (dd, *J* = 15.7, 9.7, 1H), 1.32–1.28 (m, 1H), 1.14 (s, 9H), 1.07 (s, 9H), 1.05 (s, 9H), 0.94–0.90 (m, 1H), 0.42 (dd, *J* = 10.9, 8.9, 1H), 0.17 (s, 3H), 0.16 (s, 3H); <sup>13</sup>C NMR (125 MHz, C<sub>6</sub>D<sub>6</sub>) δ 154.1 (C), 135.8 (C), 130.1 (CH), 127.1 (CH), 121.9 (CH), 119.0 (CH), 32.9 (CH<sub>2</sub>), 31.2 (CH<sub>3</sub>), 30.2 (CH<sub>3</sub>), 26.4 (CH<sub>3</sub>), 19.4 (C), 18.9 (C), 18.7 (C), 13.3 (CH<sub>2</sub>), 4.4 (CH), –3.6 (CH<sub>3</sub>), –3.7 (CH<sub>3</sub>).



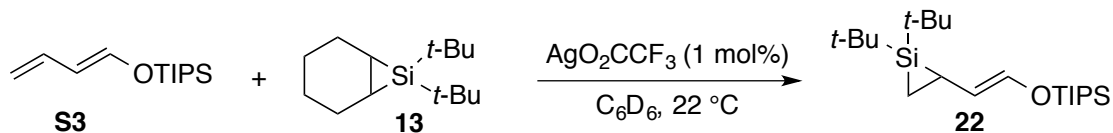

**Vinylsilacyclopropane 22.** To a solution of diene **S3** (0.047 g, 0.21 mmol) in  $C_6D_6$  (0.32 mL) in a J. Young NMR tube were added a solution of cyclohexene silacyclopropane **13** (0.22 mL, 1.3 M in  $C_6D_6$ , 0.29 mmol), and mesitylene (0.0020 mL, 0.014 mmol, internal standard). Silver trifluoroacetate (0.0008 g, 0.004 mmol) was added and the unpurified reaction mixture was analyzed by NMR spectroscopy after 10 min. Vinyl silacyclopropane **22** was formed in 84% based on comparison of the standard peak ( $\delta$  6.71) and the alkene protons. The spectral data are consistent with the data reported:<sup>5</sup>  $^1H$  NMR (500 MHz,  $C_6D_6$ )  $\delta$  6.54 (dd,  $J$  = 11.7, 1.4, 1H), 5.51 (dd,  $J$  = 11.6, 7.6, 1H), 1.70–1.64 (m, 1H), 1.12 (br s, 21H and 9H), 0.99 (s, 9H), 0.93–0.88 (m, 1H), 0.56 (dd,  $J$  = 11.0, 8.8, 1H);  $^{13}C$  NMR (125 MHz,  $C_6D_6$ )  $\delta$  138.8, 114.9, 31.0, 30.1, 19.6, 18.8, 18.5, 12.9, 12.0, 3.3.

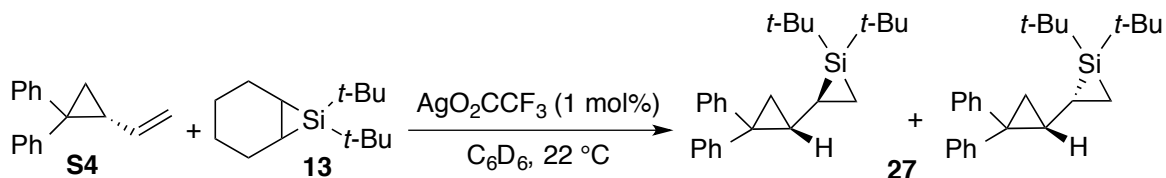

**Silacyclopropanes 27.** To a solution of alkene **S4** (0.210 mL, 1.05 M in  $C_6D_6$ , 0.220 mmol) in  $C_6D_6$  (0.30 mL) in a J. Young NMR tube were added cyclohexene silacyclopropane **13** (0.055 g, 0.25 mmol) and mesitylene (0.0020 mL, 0.014 mmol, internal standard). Silver trifluoroacetate (0.008 g, 0.004 mmol) was added and the unpurified reaction mixture was analyzed by NMR spectroscopy after 20 min. Silacyclopropanes **27** were formed in 95% yield as a 74:26 mixture of diastereomers based on comparison of the standard peak ( $\delta$  6.71) and the silacyclopropane protons:  $^1H$  NMR (600 MHz,  $C_6D_6$ )  $\delta$  7.54–7.52 (m, 2H), 7.44–7.43 (m, 0.7H), 7.28–7.26 (m,

2H), 7.21–7.19 (m, 3H), 7.12–7.05 (m, 4.35H), 7.01–6.96 (m, 1.35H), 1.91–1.87 (m, 0.35H), 1.76 (ddd,  $J = 10.1, 9.0, 6.2$ , 1H), 1.41–1.37 (m, 2.35H), 1.35–1.33 (m, 0.7H), 1.23 (dd,  $J = 6.2, 4.7$ , 1H), 1.18 (s, 12.2H and m, 0.35H), 0.92–0.88 (m, 1H), 0.86 (s, 3.2H), 0.84 (s, 9H), 0.65 (dd,  $J = 12.2, 11.1$ , 0.35H), 0.51 (dd,  $J = 10.9, 8.9$ , 1H), 0.44–0.40 (m, 0.35H), 0.31 (ddd,  $J = 12.1, 10.1, 8.9$ , 1H), 0.18–0.13 (m, 0.35H);  $^{13}\text{C}$  NMR (150 MHz,  $\text{C}_6\text{D}_6$ , diagnostic peaks)  $\delta$  148.7 (C), 148.4 (C), 143.1 (C), 143.0 (C), 131.9 (CH), 131.7 (CH), 128.90 (CH), 128.85 (CH), 128.7 (CH), 128.6 (CH), 128.3 (CH), 127.8 (CH), 126.9 (CH), 126.7 (CH), 126.1 (CH), 126.0 (CH), 39.1 (C), 36.8 (C), 31.5 (CH), 31.20 ( $\text{CH}_3$ ), 31.18 ( $\text{CH}_3$ ), 28.6 ( $\text{CH}_3$ ), 27.9 ( $\text{CH}_3$ ), 24.9 ( $\text{CH}_2$ ), 24.0 ( $\text{CH}_2$ ), 19.3 (C), 19.2 (C), 18.6 (C), 18.5 (C), 16.8 (CH), 15.6 (CH), 4.9 ( $\text{CH}_2$ ), 3.0 ( $\text{CH}_2$ ).

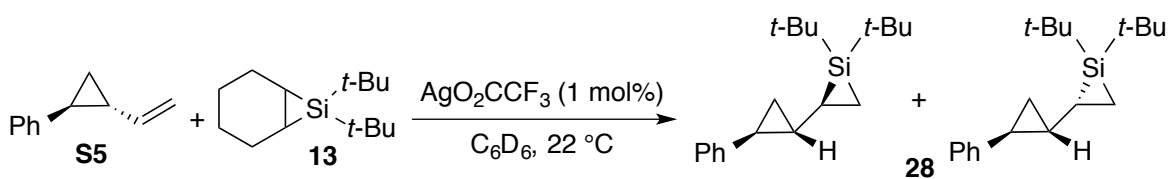

**Silacyclopropanes 28.** To a solution of alkene **S5** (0.100 mL, 740 mM in  $\text{C}_6\text{D}_6$ , 0.0740 mmol), cyclohexene silacyclopropane **13** (0.120 mL, 1.05 M in  $\text{C}_6\text{D}_6$ , 0.126 mmol) and mesitylene (0.0020 mL, 0.014 mmol, internal standard) in  $\text{C}_6\text{D}_6$  (0.260 mL) in a J. Young NMR tube was added a solution of  $\text{AgO}_2\text{CCF}_3$  (0.0015 mL, 0.050 mM, 0.00074 mmol). After 15 min, the  $^1\text{H}$  NMR spectrum was recorded. Silacyclopropanes **28** were formed in 70% as a 50:50 mixture of diastereomers based on comparison of the standard peak ( $\delta$  6.72) and the methine protons of the silacyclopropane ring:  $^1\text{H}$  NMR (600 MHz,  $\text{C}_6\text{D}_6$ )  $\delta$  7.15–7.12 (m, 4H), 7.04–7.00 (m, 4H), 6.99–6.97 (m, 2H), 1.89–1.84 (m, 1H), 1.75–1.72 (m, 1H), 1.30–1.22 (m, 3H), 1.11 (s, 9H), 1.09 (s, 9H), 1.00 (s, 18H and m, 1H), 0.89–0.82 (m, 4H), 0.75 (dd,  $J = 12.3, 10.8$ , 1H), 0.64 (dt,  $J = 12.2, 8.3$ , 1H), 0.40 (dd,  $J = 10.9, 8.7$ , 1H), 0.37–0.33 (m, 1H);  $^{13}\text{C}$  NMR (150 MHz,  $\text{C}_6\text{D}_6$ )  $\delta$  145.0 (C), 144.8 (C), 128.92 (CH), 128.90 (CH), 126.2 (CH), 126.0 (CH), 125.72 (CH), 125.66

(CH), 31.05 (CH<sub>3</sub>), 30.95 (CH<sub>3</sub>), 30.12 (CH<sub>3</sub>), 30.09 (CH<sub>3</sub>), 27.4 (CH), 27.2 (CH), 27.0 (CH), 26.7 (CH), 19.8 (CH<sub>2</sub>), 19.5 (CH<sub>2</sub>), 19.2 (C), 18.9 (C), 18.59 (C), 18.55 (C), 18.3 (CH), 17.0 (CH), 3.3 (CH<sub>2</sub>), 2.1 (CH<sub>2</sub>).

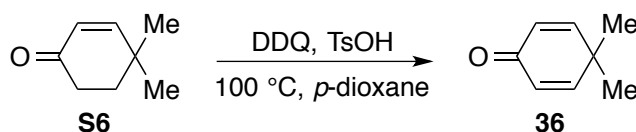

**Dienone 36.** To a solution of 3,3-dimethylcyclohexene-1-one (0.7 mL, 5 mmol) in *p*-dioxane (50 mL) were added DDQ (1.4 g, 6.2 mmol) and TsOH (1.0 g, 5.3 mmol) in a Schlenk tube. The reaction mixture was degassed (freeze-pump-thaw, 3 cycles) and heated to 100 °C. After 48 h, the reaction mixture was brought to room temperature. Diethyl ether (50 mL) was added and the organic layer was washed with 10% aqueous NaOH (3 x 25 mL), H<sub>2</sub>O (3 x 25 mL), and brine (50 mL), dried over MgSO<sub>4</sub>, and concentrated *in vacuo*. Excess *p*-dioxane was removed as an azeotrope with ethanol to provide dienone **36** as an orange oil that was used without further purification (0.36 g, 56%). The spectral data are consistent with the data reported:<sup>10,11</sup> <sup>1</sup>H NMR (600 MHz, CDCl<sub>3</sub>) δ 6.82 (d, *J* = 10.0, 2H), 6.18 (d, *J* = 10.0, 2H), 1.25 (s, 6H); <sup>13</sup>C NMR (150 MHz, CDCl<sub>3</sub>) δ 186.1, 156.9, 127.5, 38.1, 26.9; HRMS (TOF MS ES+) *m/z* calcd for C<sub>8</sub>H<sub>11</sub>O (M+H)<sup>+</sup> 123.0804, found 123.0806.

### III. Stereochemical Proof

#### A. General Procedure for 1-D NOESY experiment

All NOE data were collected on degassed acetone-*d*<sub>6</sub> samples with a mixing time of 0.30 seconds. All peaks in the <sup>1</sup>H NMR spectra were assigned using a combination of <sup>1</sup>H NMR chemical shifts, <sup>1</sup>H/<sup>1</sup>H COSY, <sup>13</sup>C NMR chemical shifts, and <sup>1</sup>H/<sup>13</sup>C HSQC experiments.

## B. NOE Data

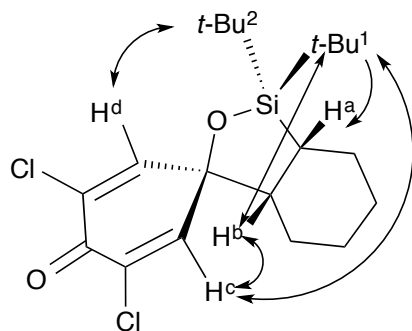Relevant NOE data for oxasilacyclopentane 16 (acetone-*d*<sub>6</sub>)

*t*-Bu<sup>1</sup> irradiated: H<sup>a</sup> (0.1%), H<sup>b</sup> (0.3%), H<sup>c</sup> (0.1%)

*t*-Bu<sup>2</sup> irradiated: H<sup>d</sup> (0.2%)

H<sup>b</sup> irradiated: *t*-Bu<sup>1</sup> (2.4%), H<sup>c</sup> (0.2%)

H<sup>c</sup> irradiated: *t*-Bu<sup>1</sup> (1.2%), H<sup>b</sup> (1.4%)

H<sup>d</sup> irradiated: *t*-Bu<sup>2</sup> (1.8%)

## IV. References

- (1) Pangborn, A. B.; Giardello, M. A.; Grubbs, R. H.; Rosen, R. K.; Timmers, F. J. *Organometallics* **1996**, *15*, 1518–1520.
- (2) Boudkoux, P.; Samaraweera, U.; Sooriyakumaran, R.; Chrusciel, J.; Anderson, K. R. *Angew. Chem. Int. Ed. Engl.* **1988**, *27*, 1355–1356.
- (3) Ćiraković, J.; Driver, T. G.; Woerpel, K. A. *J. Org. Chem.* **2004**, *69*, 4007–4012.
- (4) Howard, B. E.; Woerpel, K. A. *Org. Lett.* **2007**, *9*, 4651–4653.
- (5) Greene, M. A.; Prévost, M.; Tolopilo, J.; Woerpel, K. A. *J. Am. Chem. Soc.* **2012**, *134*, 12482–12484.
- (6) Tripoli, R.; Cayzer, T. N.; Willis, A. C.; Sherburn, M. S.; Paddon-Row, M. N. *Org. Biomol. Chem.* **2007**, *5*, 2606–2616.
- (7) Schmittl, M.; Mahajan, A. A.; Bucher, G.; Bats, J. W. *J. Org. Chem.* **2007**, *72*, 2166–2173.
- (8) Fu, H.; Look, G. C.; Zhang, W.; Jacobsen, E. N.; Wong, C. H. *J. Org. Chem.* **1991**, *56*, 6497–6500.
- (9) Pelly, S. C.; Govender, S.; Fernandes, M. A.; Schmalz, H.-G.; de Koning, C. B. *J. Org. Chem.* **2007**, *72*, 2857–2864.
- (10) Bordwell, F. G.; Wellman, K. M. *J. Org. Chem.* **1963**, *28*, 2544–2550.
- (11) Gramlich, W. *Liebigs Annalen* **1979**, 121–132.

## V. Selected Spectra

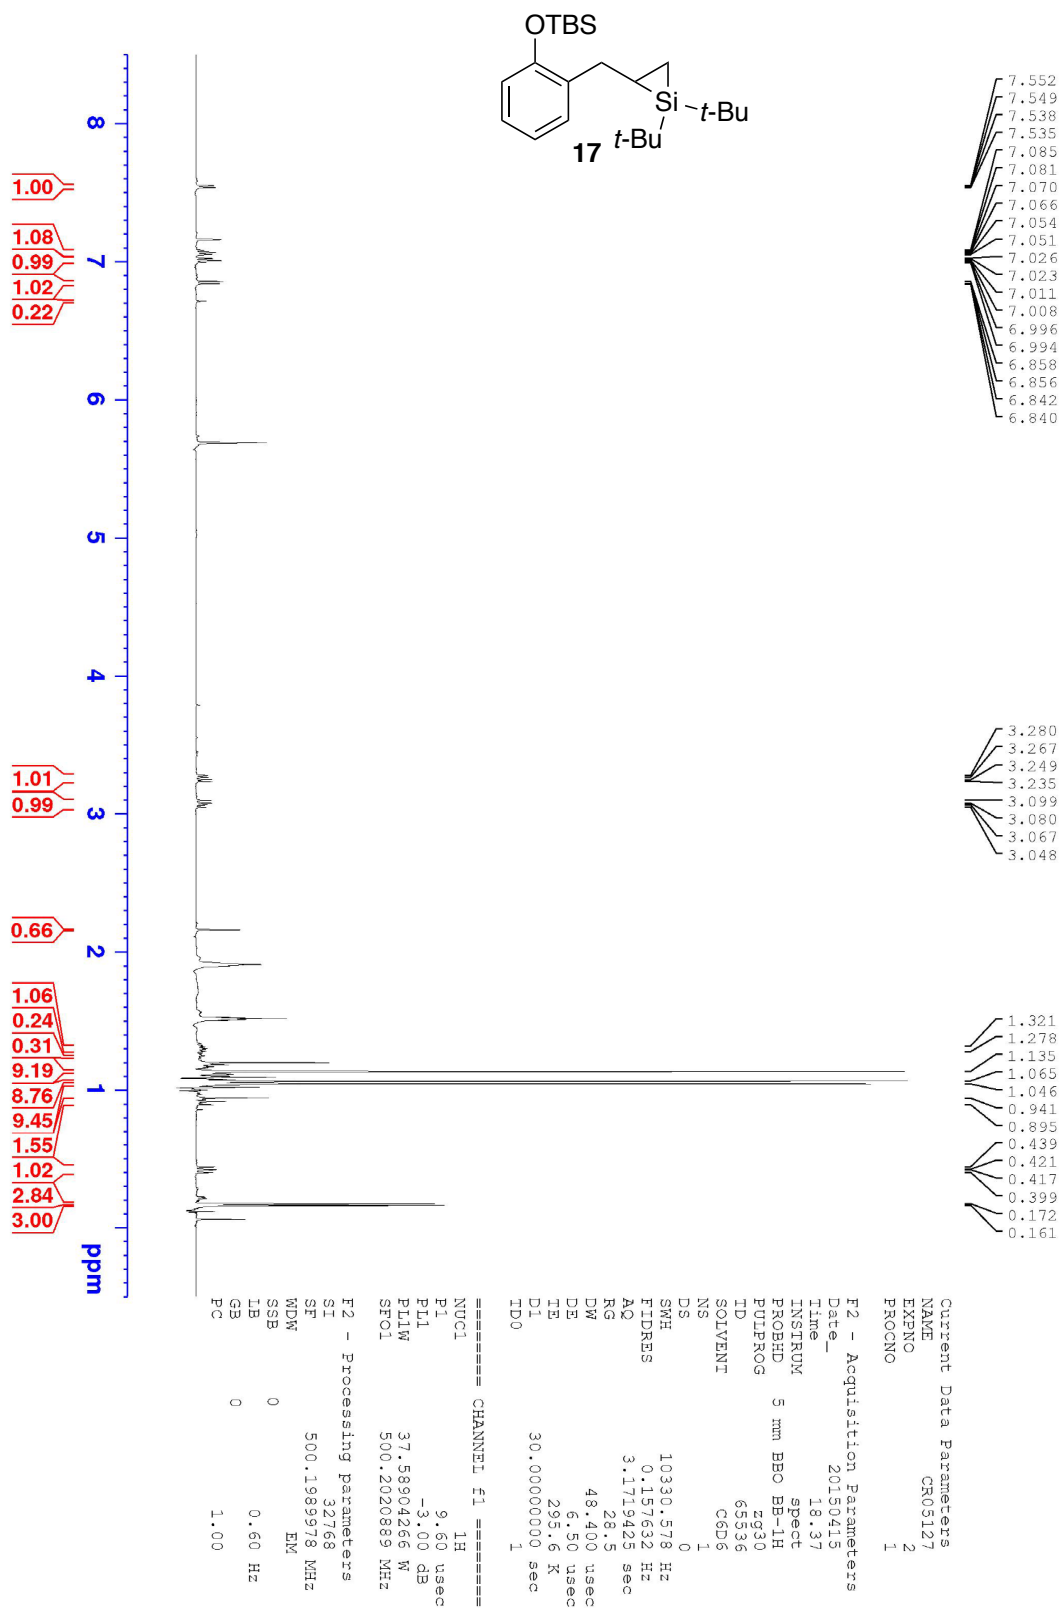

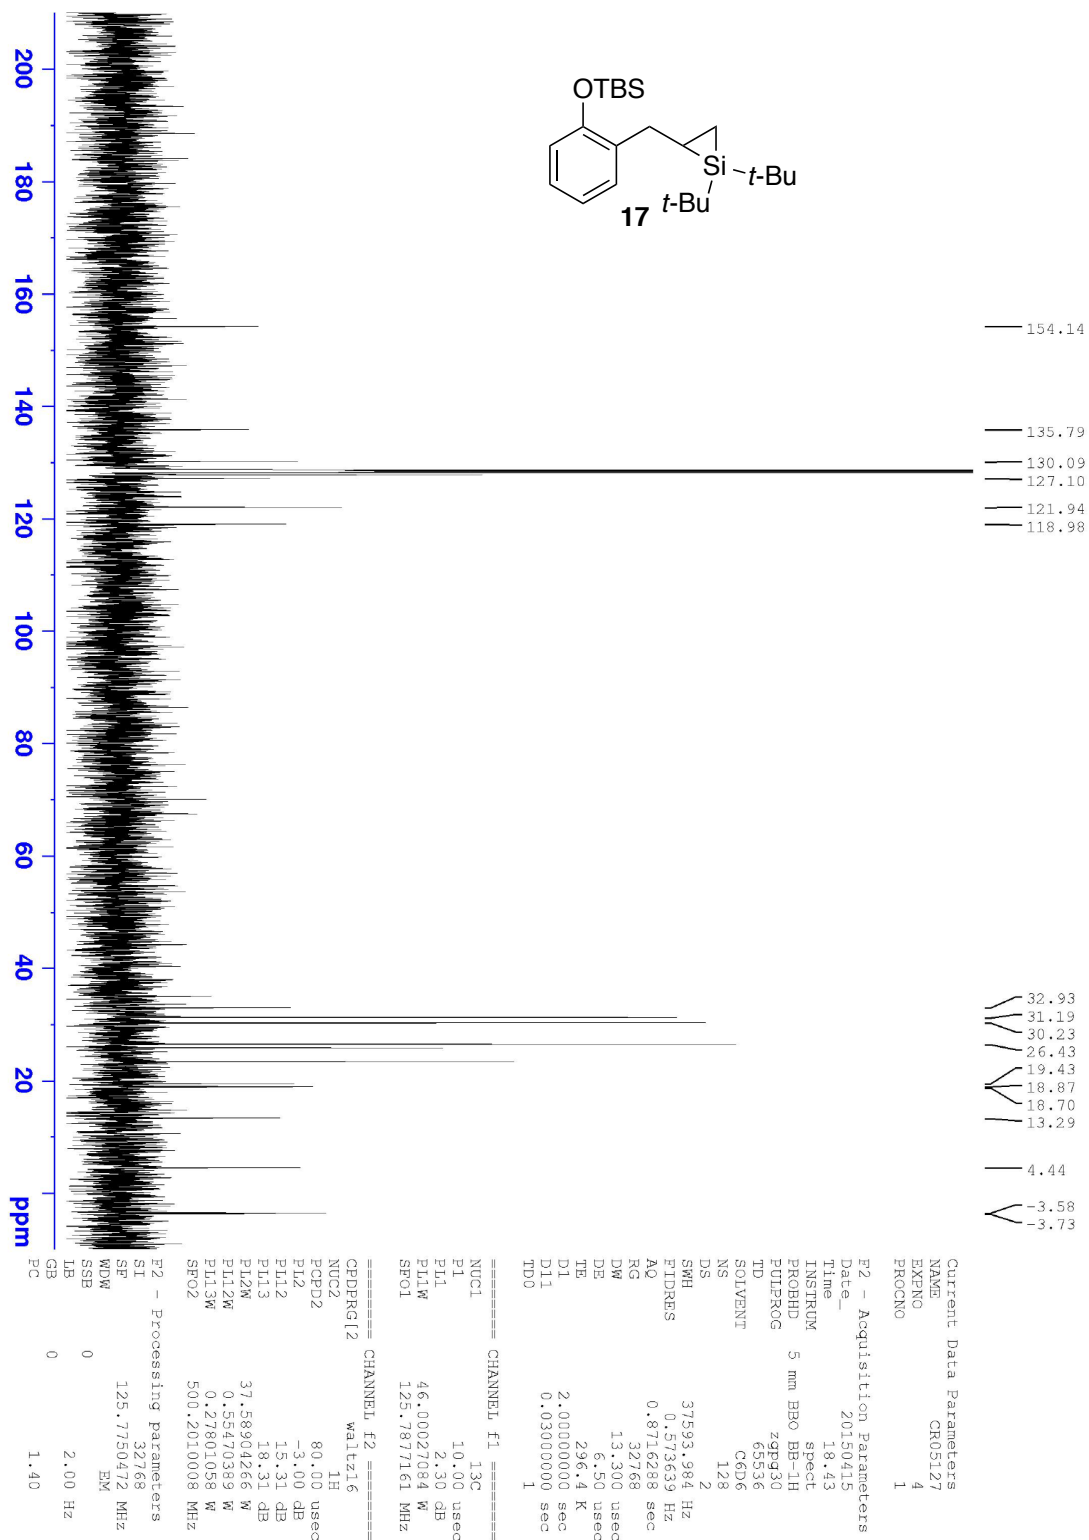

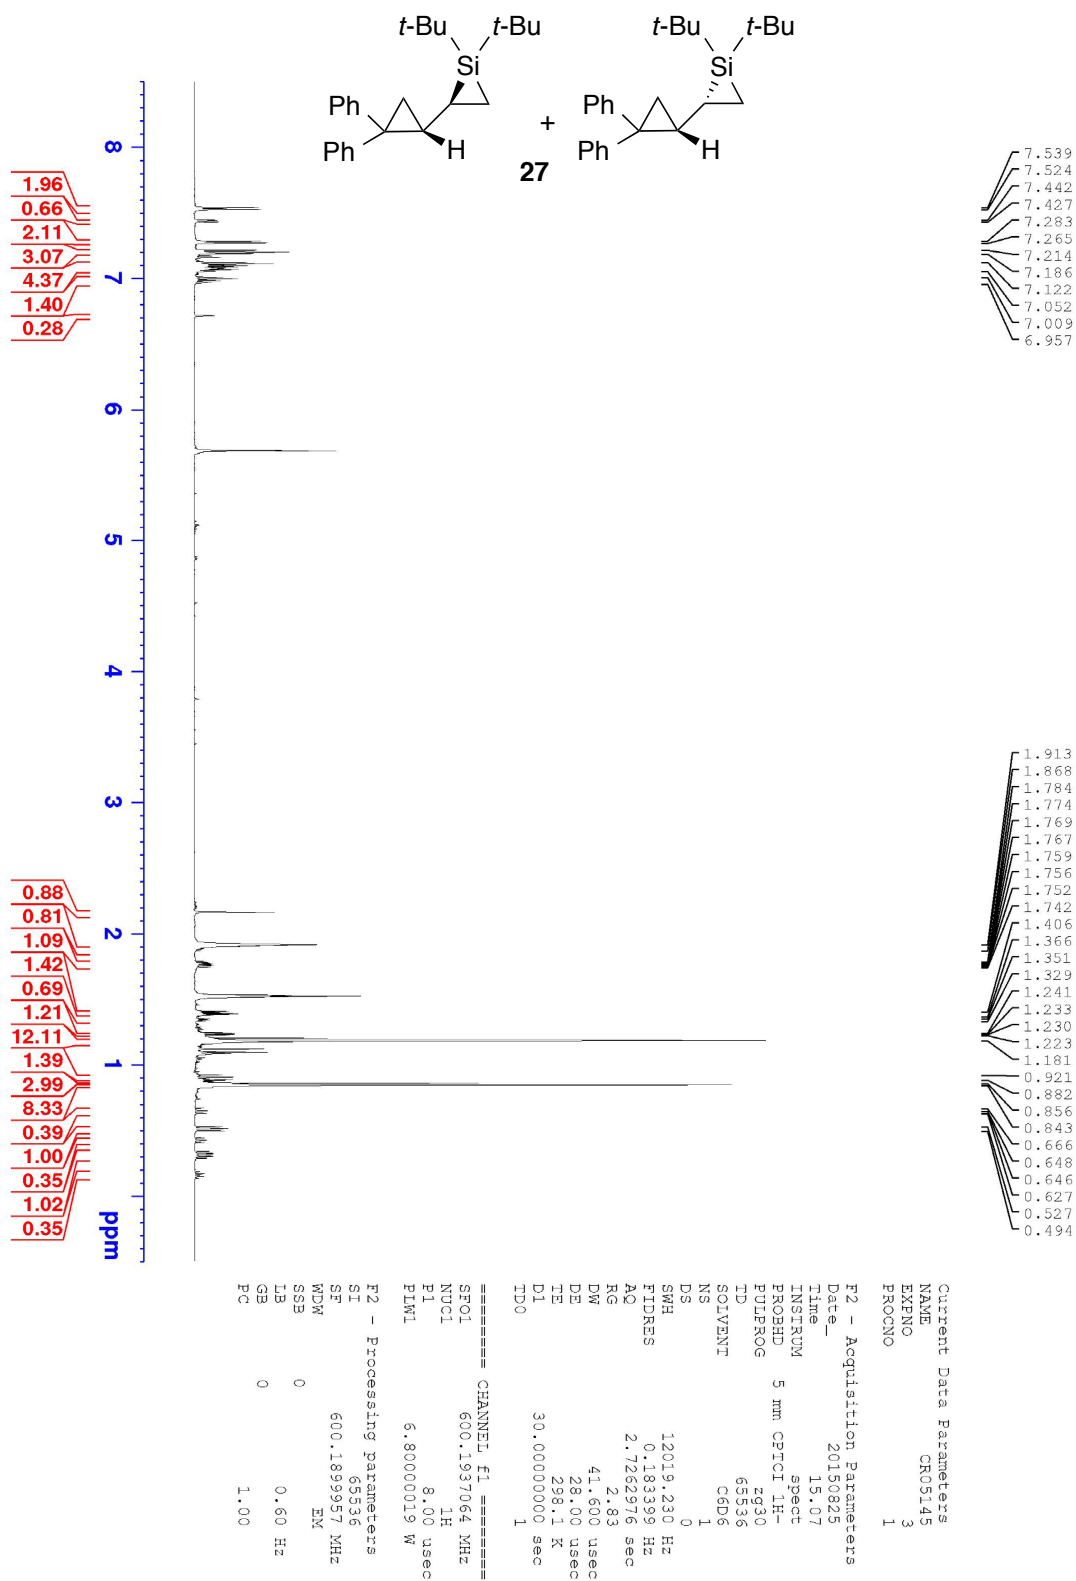

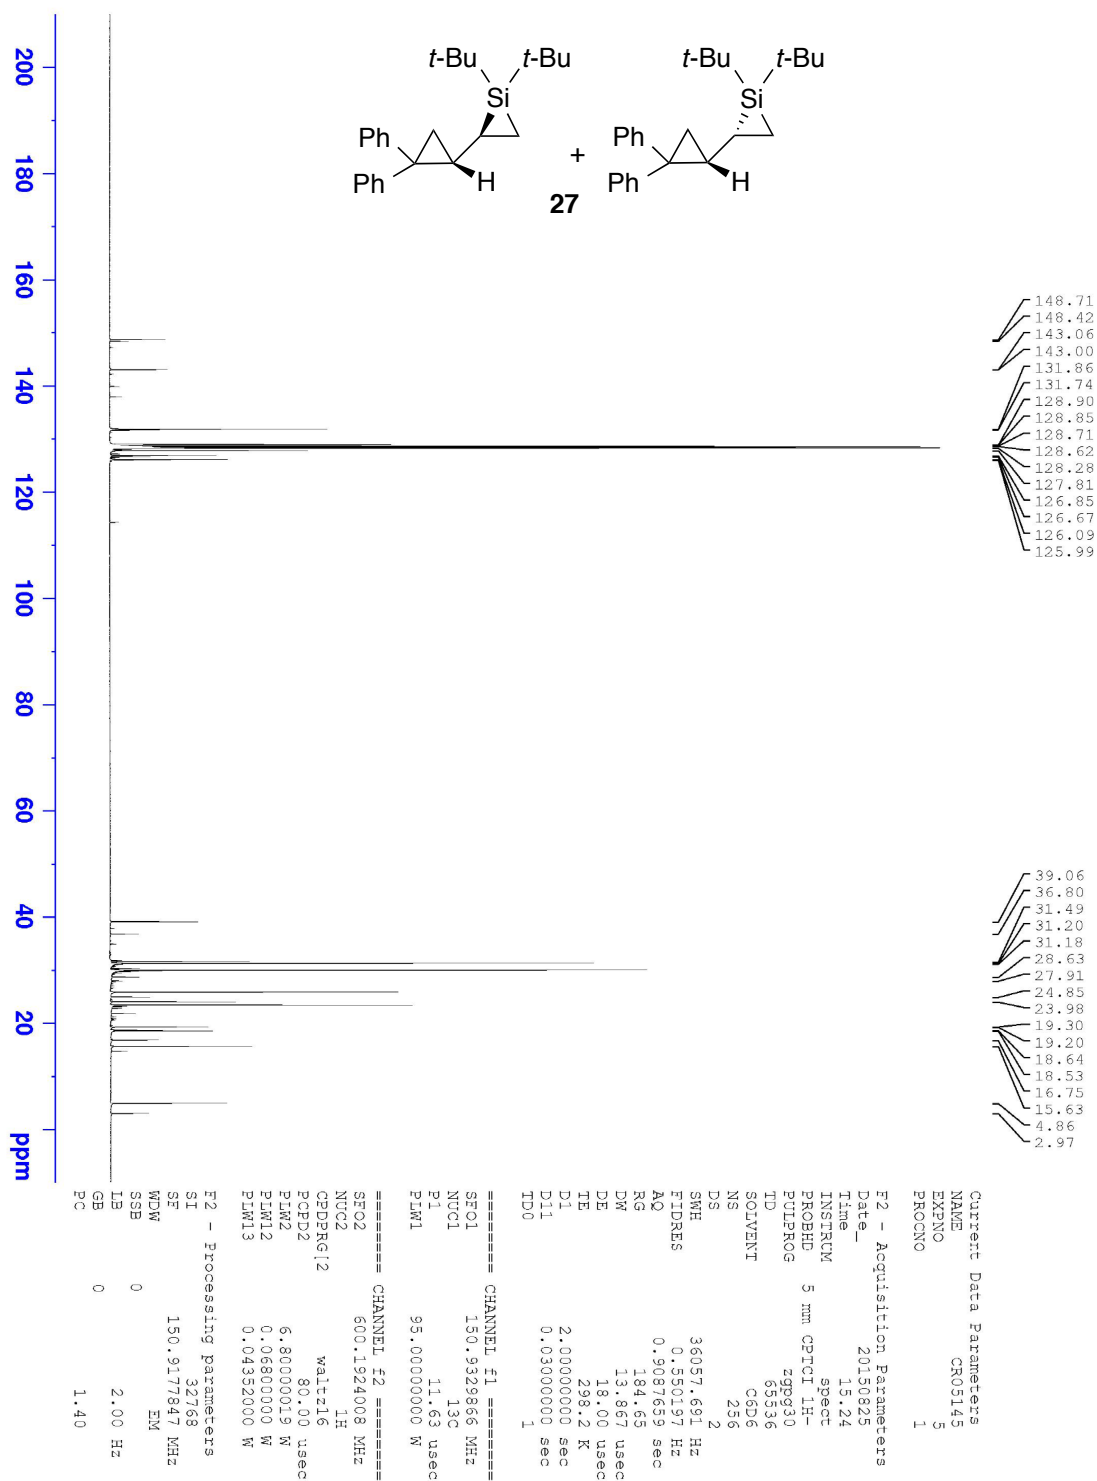



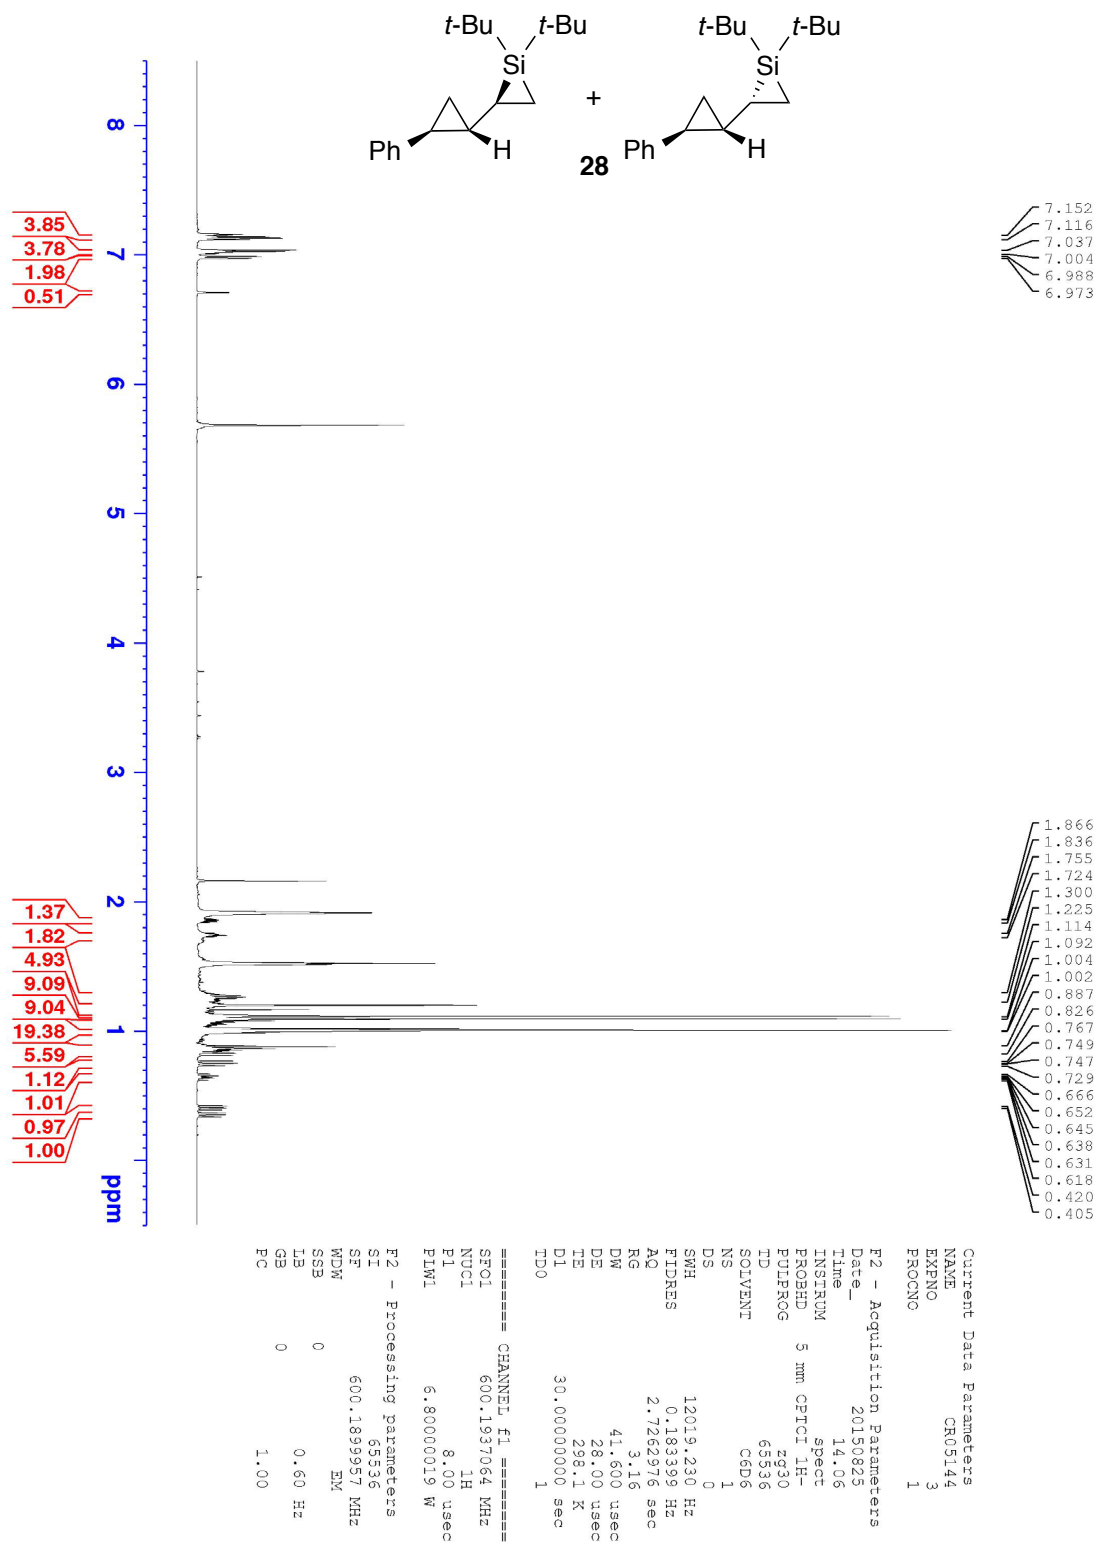

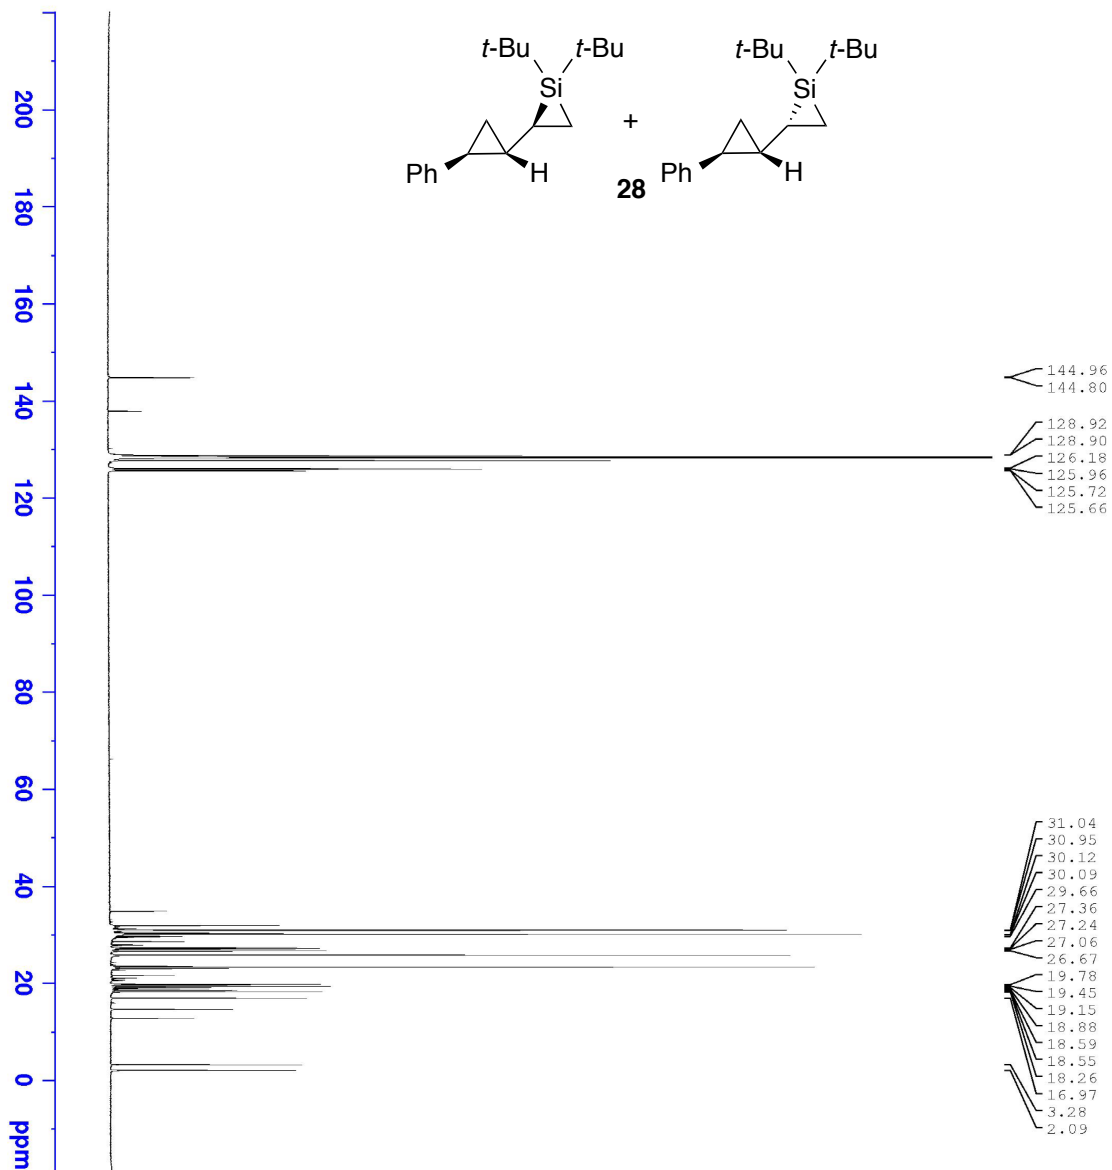

```

Current Data Parameters
NAME          CRO5144
EXPNO         3
PROCNO        1

F2 - Acquisition Parameters
Date_         20150825
Time_         14.25
INSTRUM       spect
PROBHD        5 mm CPTCI 1H-
PULPROG       zgpg30
TD            65536
SOLVENT       CDCl3
NS            256
DS            2
SWH           36057.691 Hz
FIDRES       0.550197 Hz
AQ           0.9087659 sec
RG           184.65
DW           13.867 usec
DE           18.00 usec
TE           298.1 K
D1           2.00000000 sec
D11          0.03000000 sec
TD0          1

===== CHANNEL f1 =====
SFO1         150.9329866 MHz
NUC1         13C
P1           11.63 usec
PLM1         95.00000000 W

===== CHANNEL f2 =====
SFO2         600.1924008 MHz
NUC2         1H
PCPD2        waltz16
PCPD2        80.00 usec
PLM2         6.80000019 W
PLM12        0.06800000 W
PLM13        0.04356000 W

F2 - Processing parameters
SI           32768
SF           150.9177829 MHz
WDW          EM
SSB          0
LB           2.00 Hz
GB           0
PC           1.40
  
```

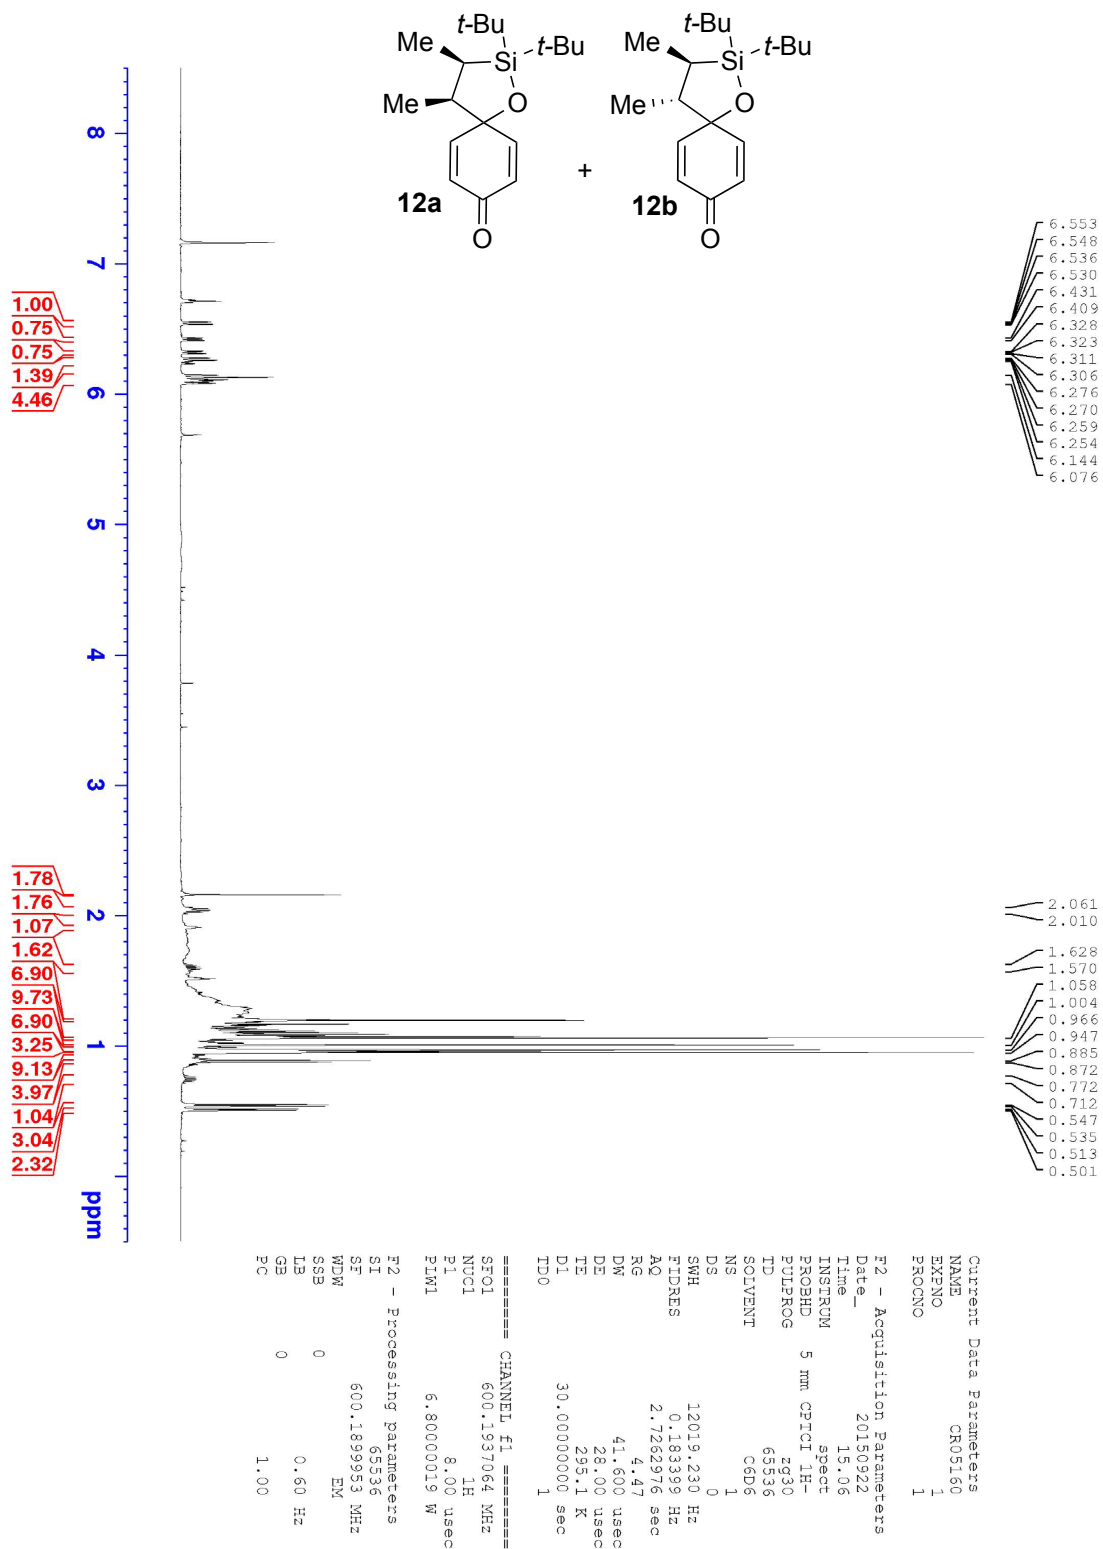

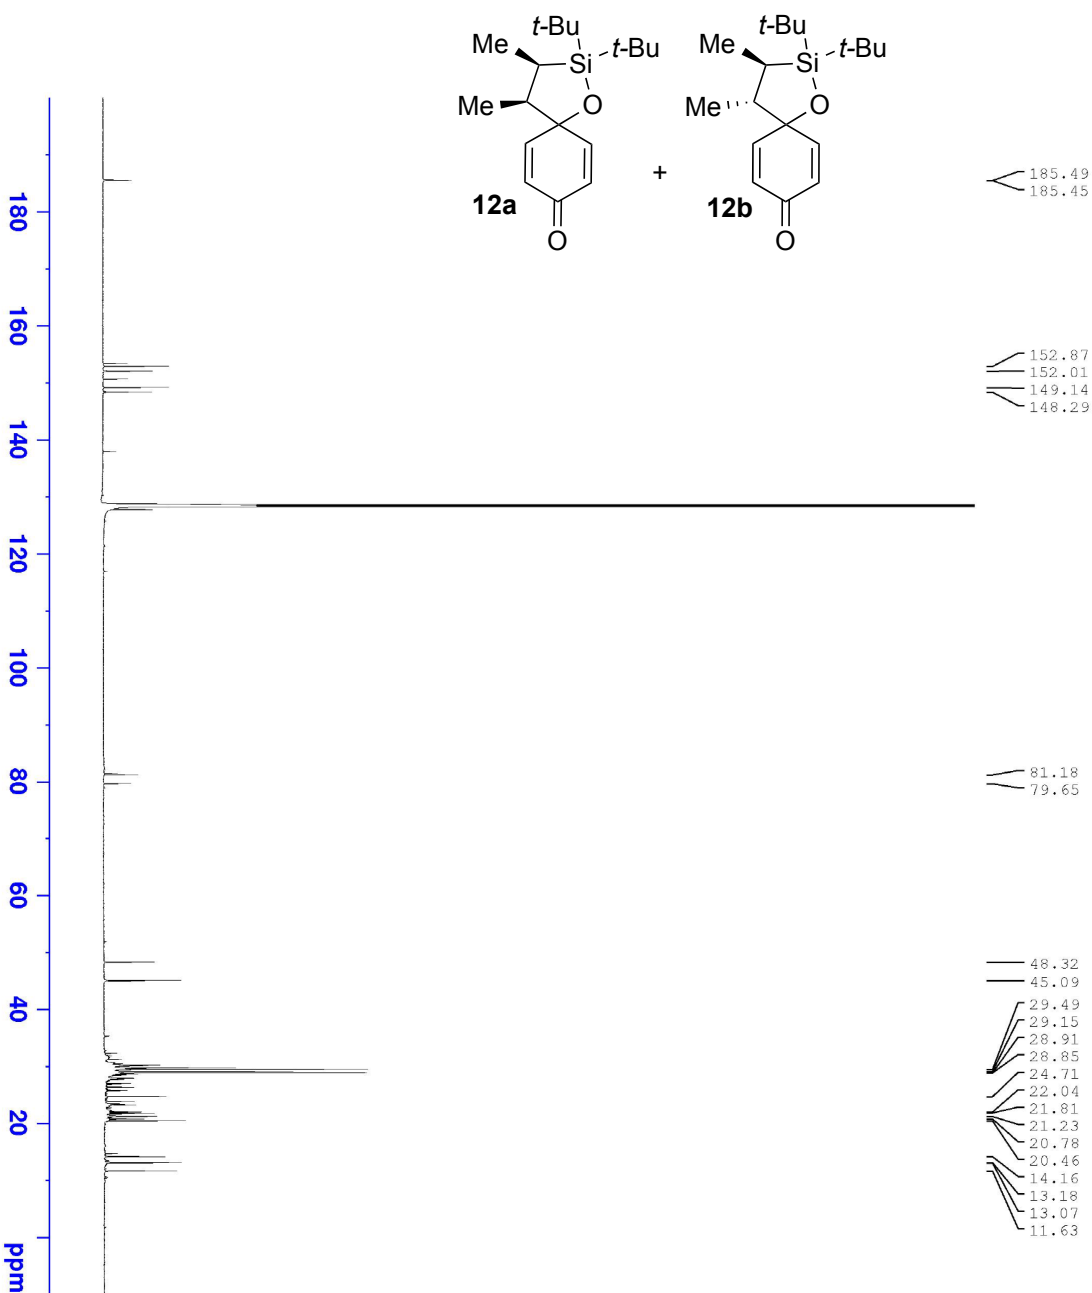

Current Data Parameters

|        |         |
|--------|---------|
| NAME   | CR05160 |
| EXPNO  | 3       |
| PROCNO | 1       |

F2 - Acquisition Parameters

|         |                |
|---------|----------------|
| Date_   | 20150922       |
| Time    | 15.36          |
| INSTRUM | spect          |
| PROBHD  | 5 mm CPIC1 1H- |
| PULPROG | zgpg30         |
| TD      | 65536          |
| SOLVENT | CDCl3          |
| NS      | 512            |
| DS      | 2              |
| SWH     | 45454.547 Hz   |
| FIDRES  | 0.693581 Hz    |
| RG      | 0.7208960 sec  |
| RG      | 184.65         |
| DW      | 11.000 usec    |
| DE      | 18.00 usec     |
| TE      | 295.1 K        |
| D1      | 2.00000000 sec |
| D11     | 0.03000000 sec |
| TD0     | 1              |

==== CHANNEL f1 =====

|      |                 |
|------|-----------------|
| SFO1 | 150.9329866 MHz |
| NUC1 | 13C             |
| P1   | 11.63 usec      |
| PLM1 | 95.00000000 W   |

==== CHANNEL f2 =====

|         |                 |
|---------|-----------------|
| SFO2    | 600.1924008 MHz |
| NUC2    | 1H              |
| CPDPRG2 | waltz16         |
| PCPD2   | 80.00 usec      |
| PLW2    | 6.80000018 W    |
| PLM12   | 0.06800000 W    |
| PLM13   | 0.04352000 W    |

F2 - Processing parameters

|     |                 |
|-----|-----------------|
| SI  | 32768           |
| ST  | 150.9177879 MHz |
| WDW | EM              |
| SSB | 0               |
| LB  | 3.00 Hz         |
| GB  | 0               |
| PC  | 1.40            |

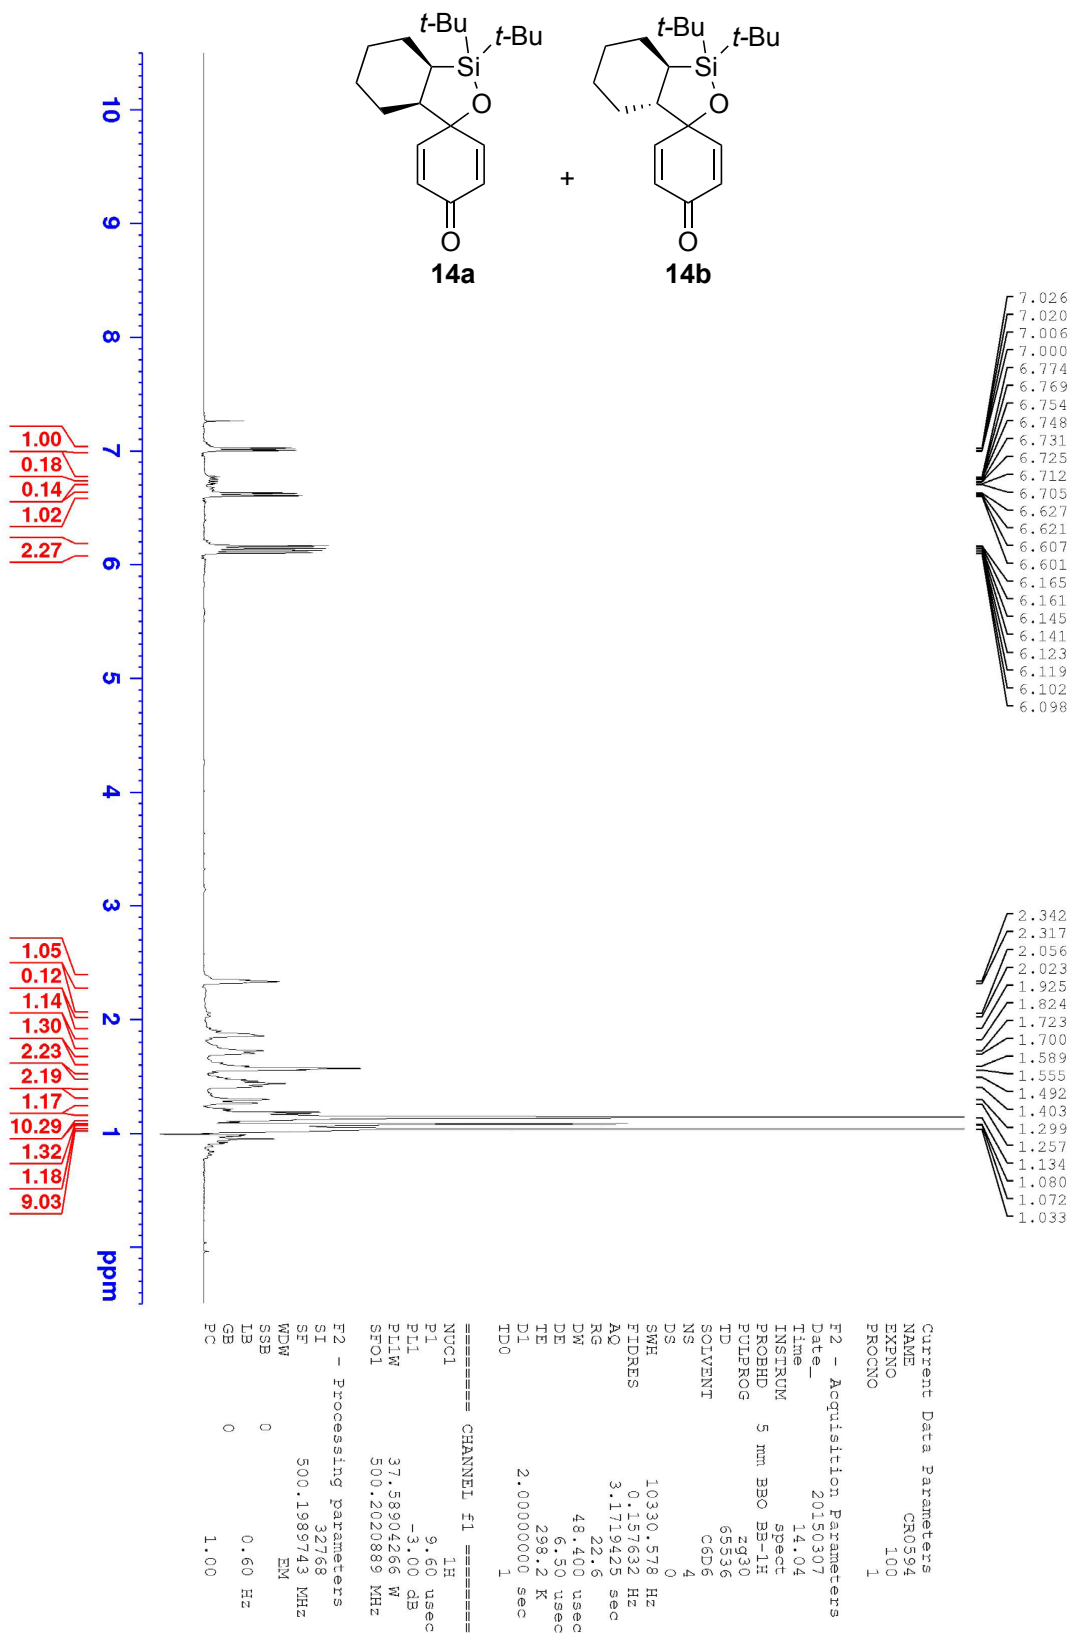

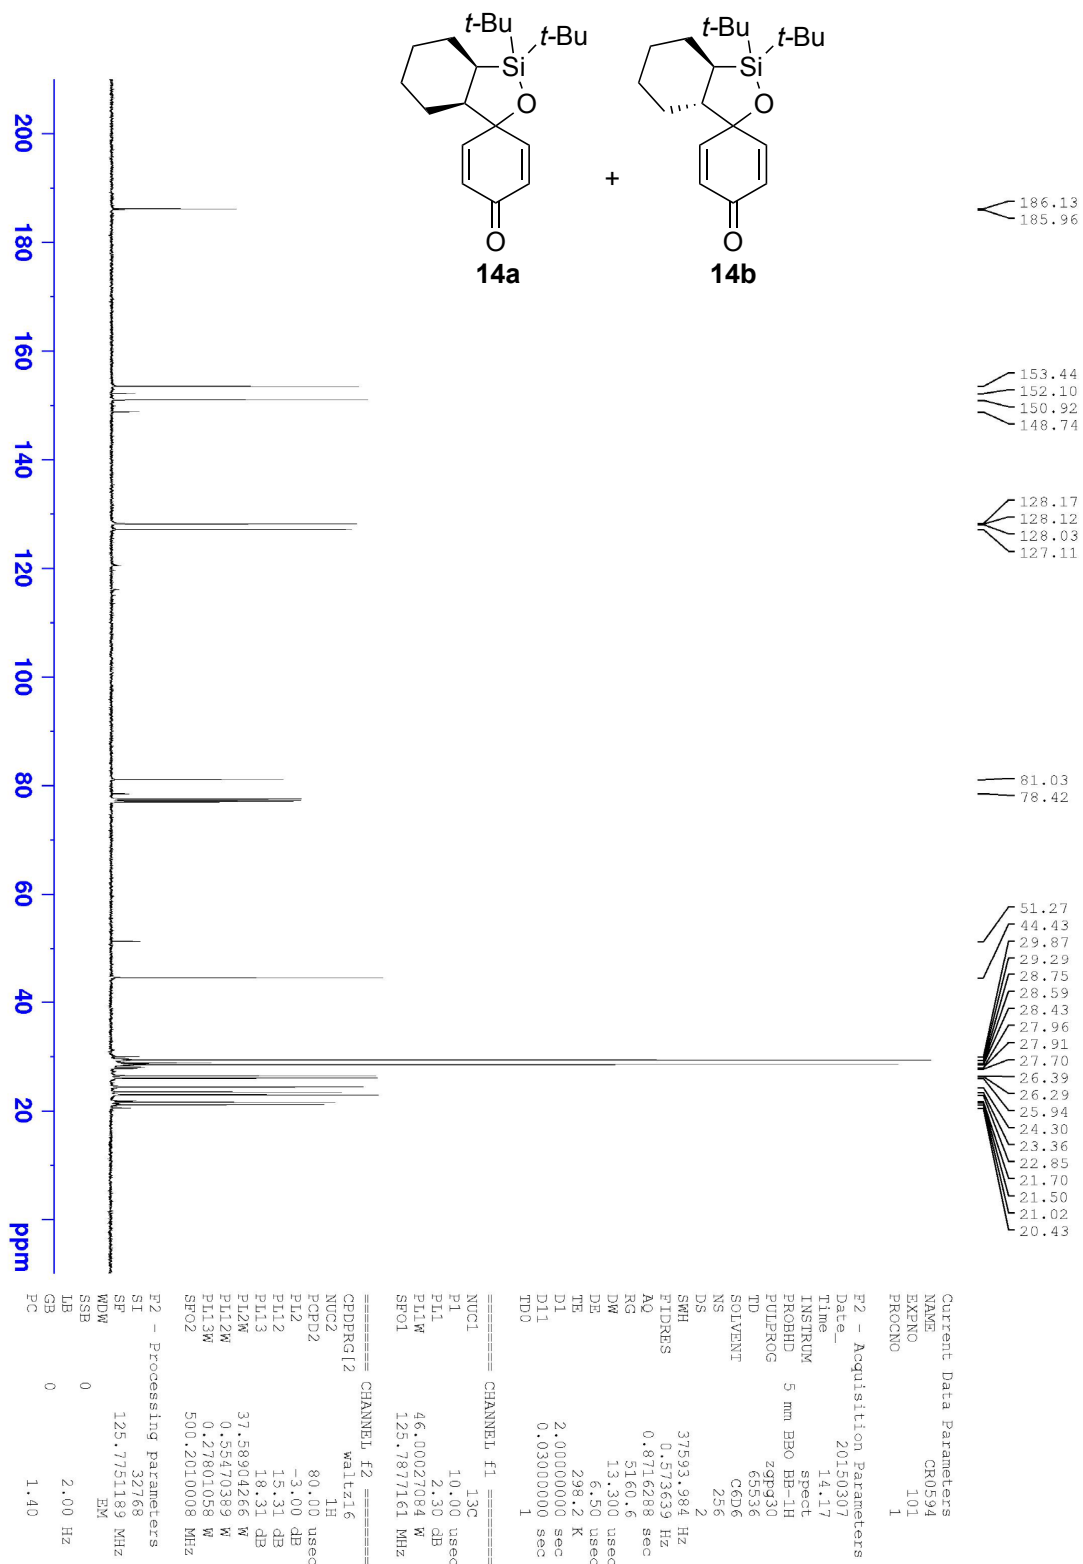

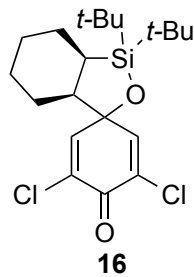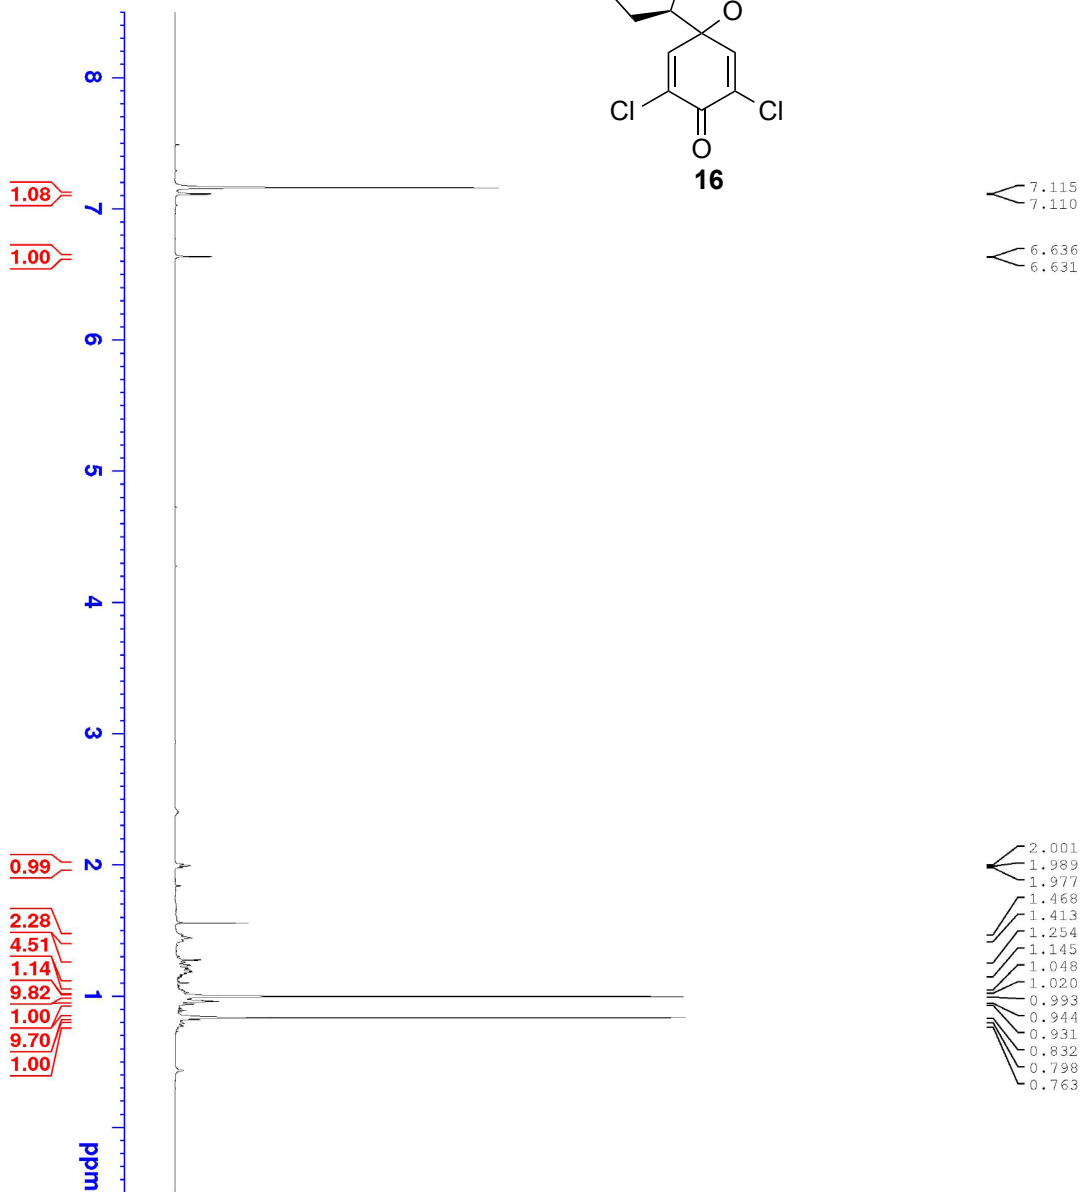

7.115  
7.110  
6.636  
6.631

2.001  
1.989  
1.977  
1.468  
1.413  
1.254  
1.145  
1.048  
1.020  
0.993  
0.944  
0.931  
0.832  
0.798  
0.763

Current Data Parameters  
NAME CR05157  
EXPNO 3  
PROCNO 1

F2 - Acquisition Parameters  
Date\_ 20150921  
Time 17.46  
INSTRUM spect  
PROBHD 5 mm CP1CI 1H-  
PULPROG zgpg30  
ID 65536  
SOLVENT CDCl3  
NS 4  
DS 0  
SWH 12019.230 Hz  
FIDRES 0.183399 Hz  
AQ 2.726276 sec  
RG 33.59  
DW 41.600 usec  
DE 28.00 usec  
TE 298.2 K  
D1 2.00000000 sec  
ID0 1

===== CHANNEL f1 =====  
SFO1 600.137064 MHz  
NUC1 1H  
P1 8.00 usec  
PLW1 6.80000019 W

F2 - Processing parameters  
SI 65536  
SF 600.1899954 MHz  
WDW EM  
SSB 0  
LB 0.60 Hz  
GB 0  
PC 1.00

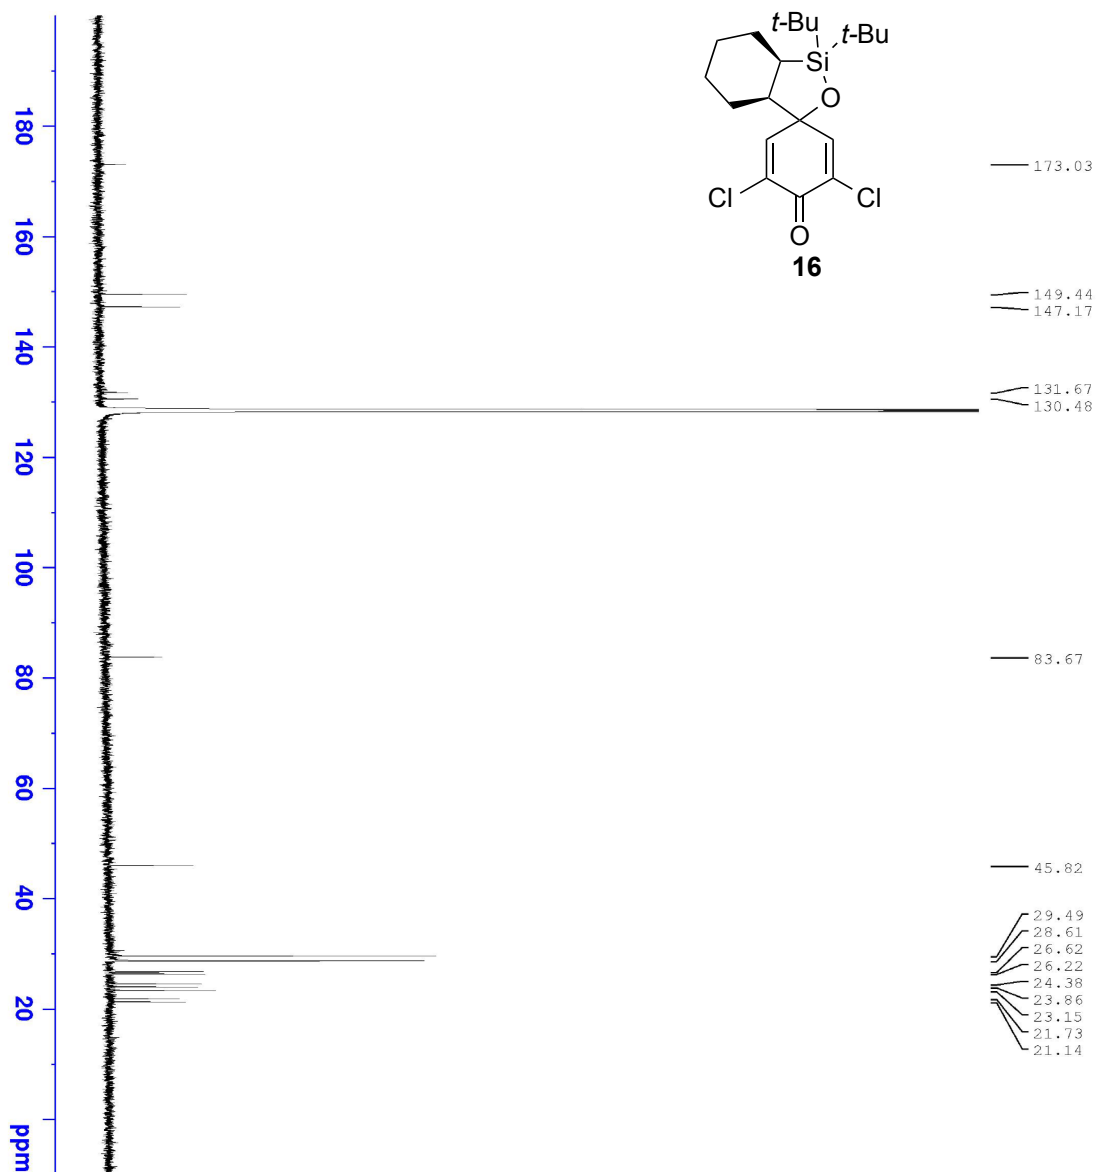

Current Data Parameters  
 NAME CRO5157  
 EXPNO 4  
 PROCNO 1

F2 - Acquisition Parameters  
 Date\_ 20150921  
 Time 17.48  
 INSTRUM spect  
 PROBHD 5 mm CPTCI 1H-  
 PULPROG zgpg30  
 TD 65536  
 SOLVENT CDCl<sub>3</sub>  
 NS 64  
 DS 2  
 SWH 45454.547 Hz  
 FIDRES 0.693581 Hz  
 AQ 0.7208960 sec  
 RG 184.65  
 DW 11.000 usec  
 DE 18.00 usec  
 TE 298.2 K  
 D1 2.00000000 sec  
 D11 0.03000000 sec  
 TD0 1

===== CHANNEL f1 =====  
 SFO1 150.9329866 MHz  
 NUC1 13C  
 P1 11.63 usec  
 PLW1 95.00000000 W

===== CHANNEL f2 =====  
 SFO2 600.1924008 MHz  
 NUC2 1H  
 CPOPRG12 waltz16  
 PCPD2 80.00 usec  
 PLW2 6.80000019 W  
 PLW12 0.06800000 W  
 PLW13 0.04352000 W

F2 - Processing parameters  
 SI 32768  
 SF 150.9177893 MHz  
 WDW EM  
 SSB 0  
 GB 2.00 Hz  
 PC 1.40



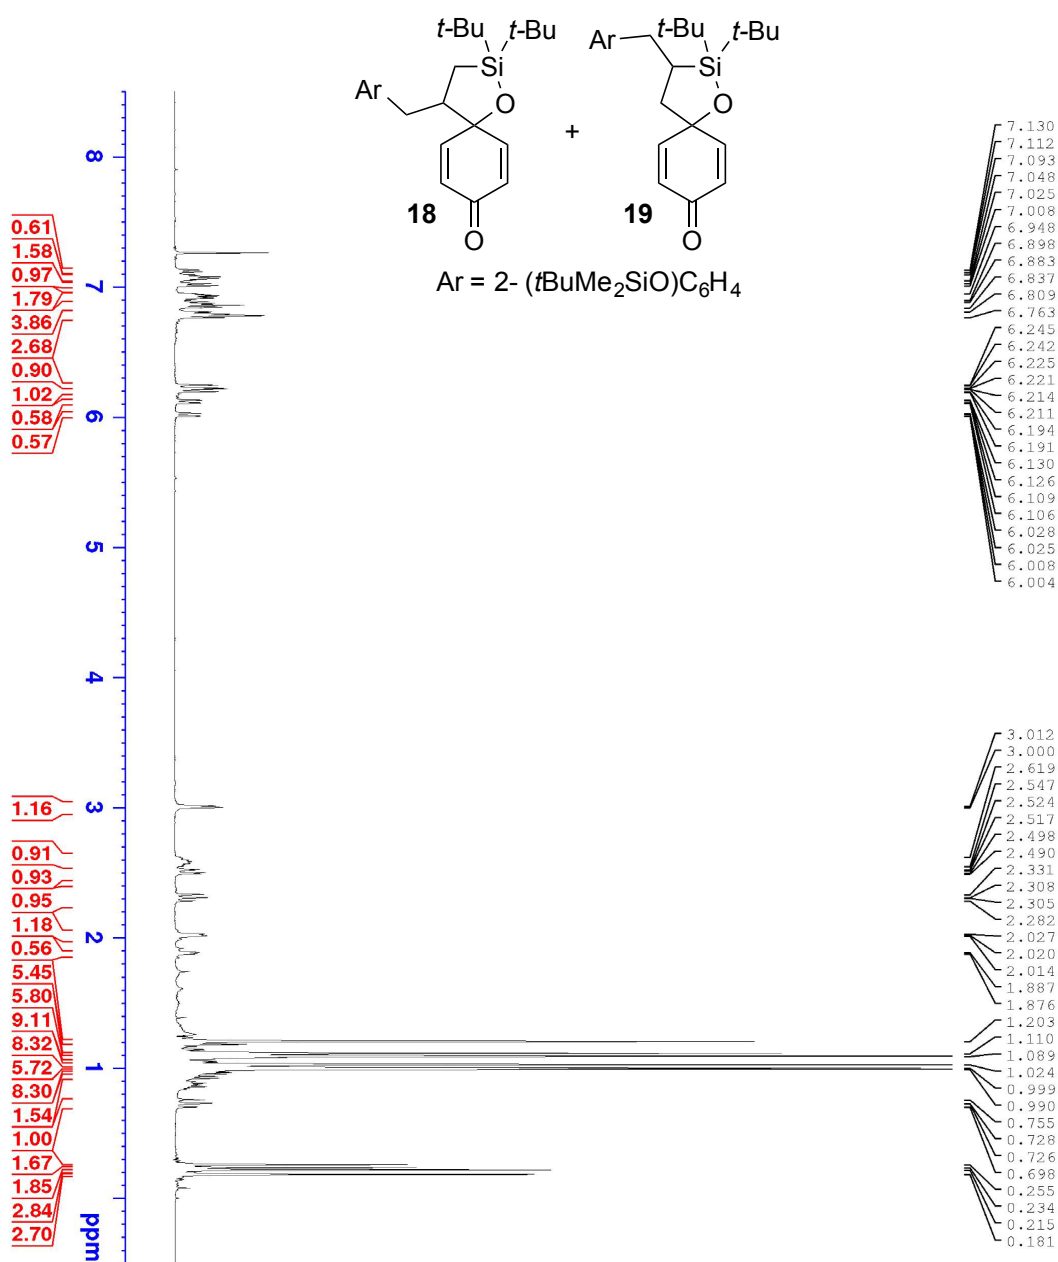

Current Data Parameters  
NAME CR05127  
EXPNO 12  
PROCNO 1

F2 - Acquisition Parameters  
Date\_ 20150416  
Time 18.43  
INSTRUM spect  
PROBHD 5 mm BBO BB-1H  
PULPROG zg30  
TD 65536  
SOLVENT CDCl<sub>3</sub>  
NS 4  
DS 0  
SWH 10330.578 Hz  
FIDRES 0.157632 Hz  
AQ 3.1719425 sec  
RG 32  
RW 48.400 usec  
DE 6.50 usec  
TE 295.3 K  
D1 2.0000000 sec  
TD0 1

===== CHANNEL f1 =====  
NUC1 1H  
P1 9.60 usec  
PL1 -3.00 dB  
PL1W 37.5890426 W  
SFO1 500.2020889 MHz

F2 - Processing parameters  
SI 32768  
SF 500.1990144 MHz  
WDW EM  
SSB 0  
LB 0.60 Hz  
GB 0  
PC 1.00

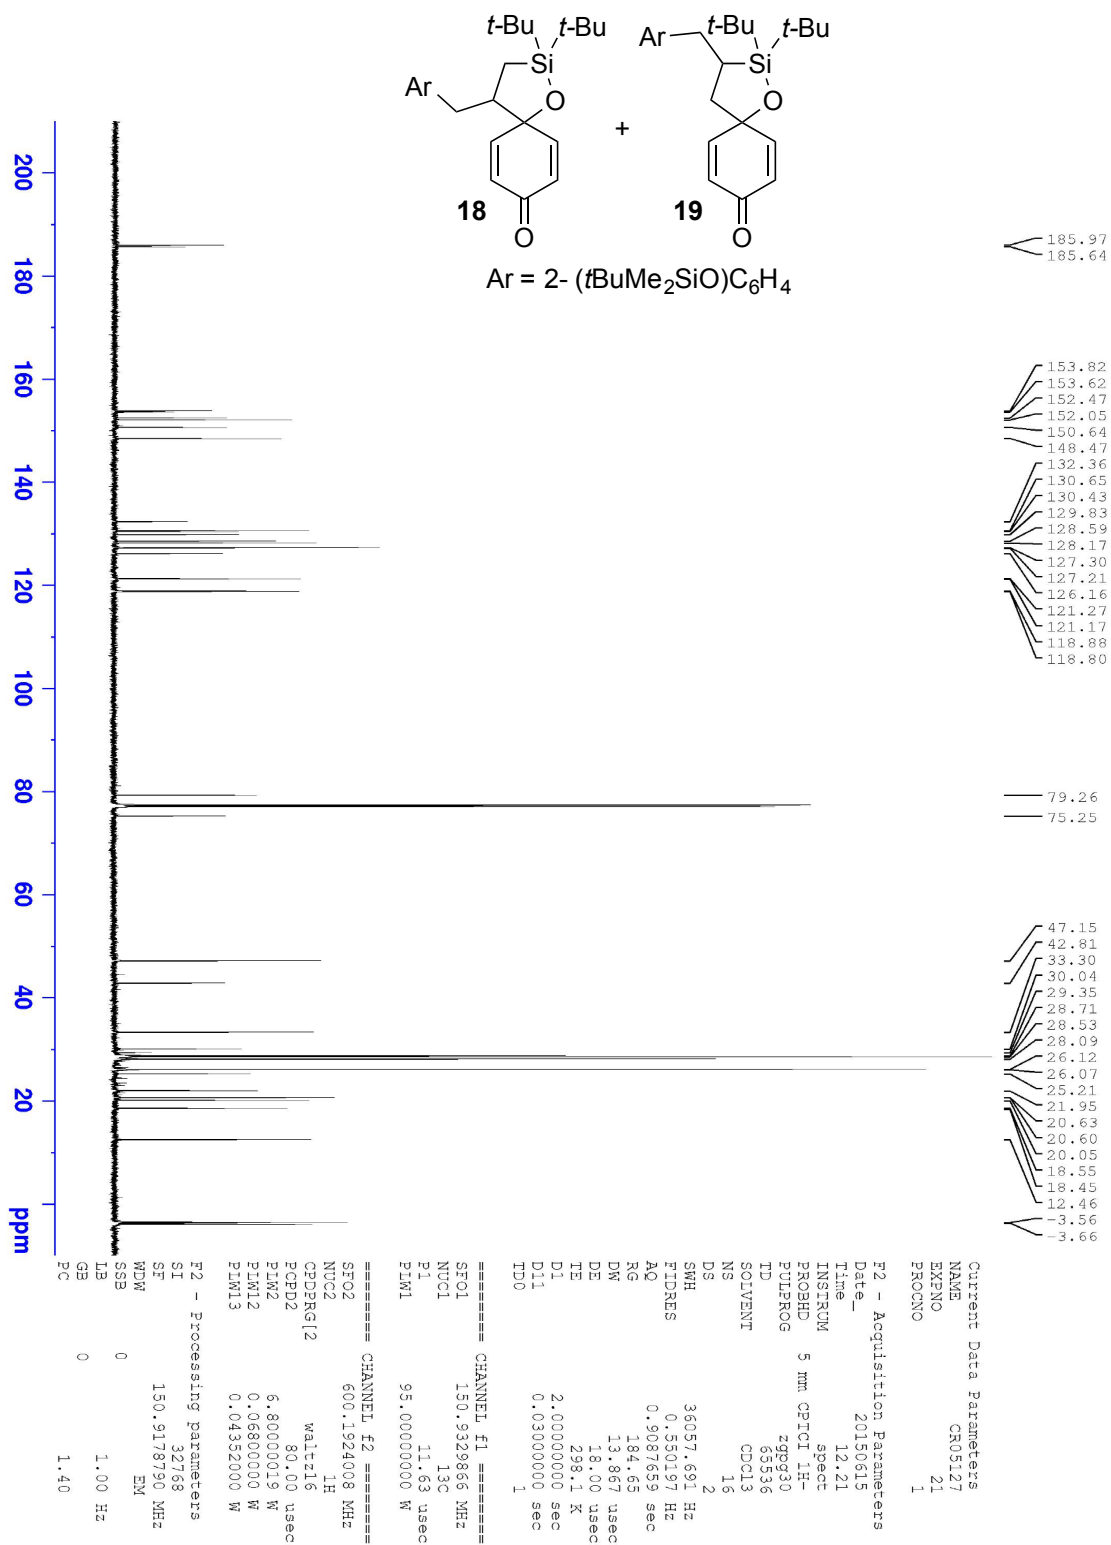

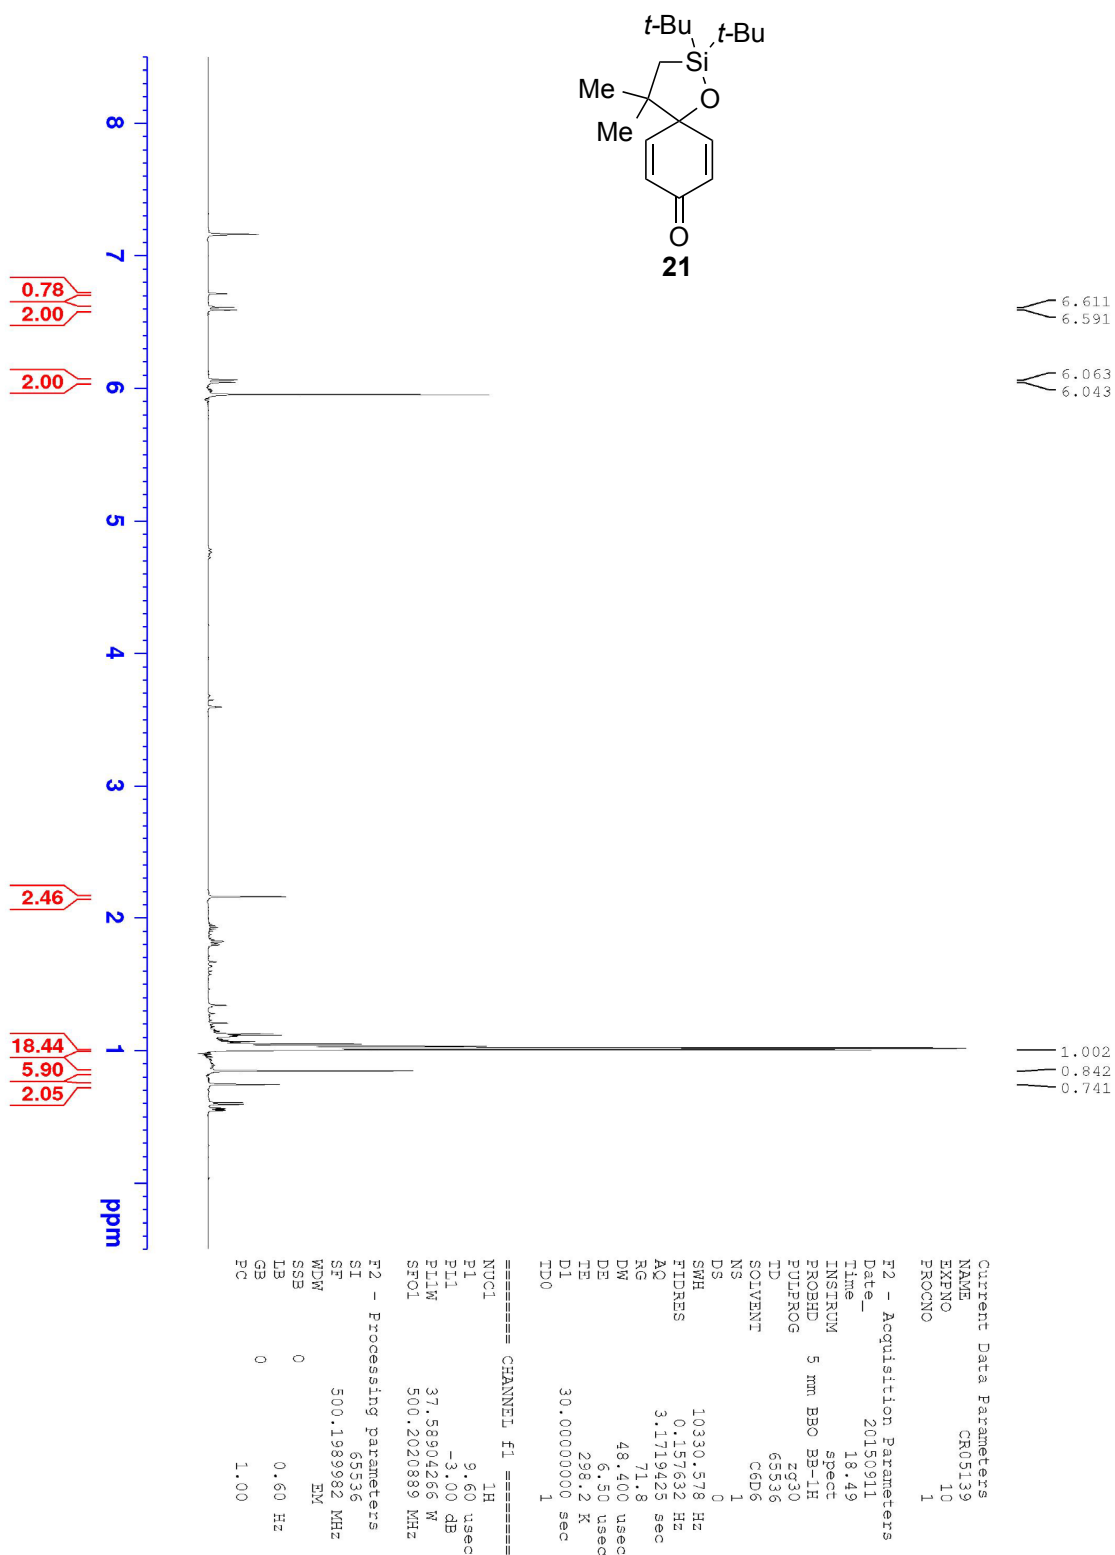

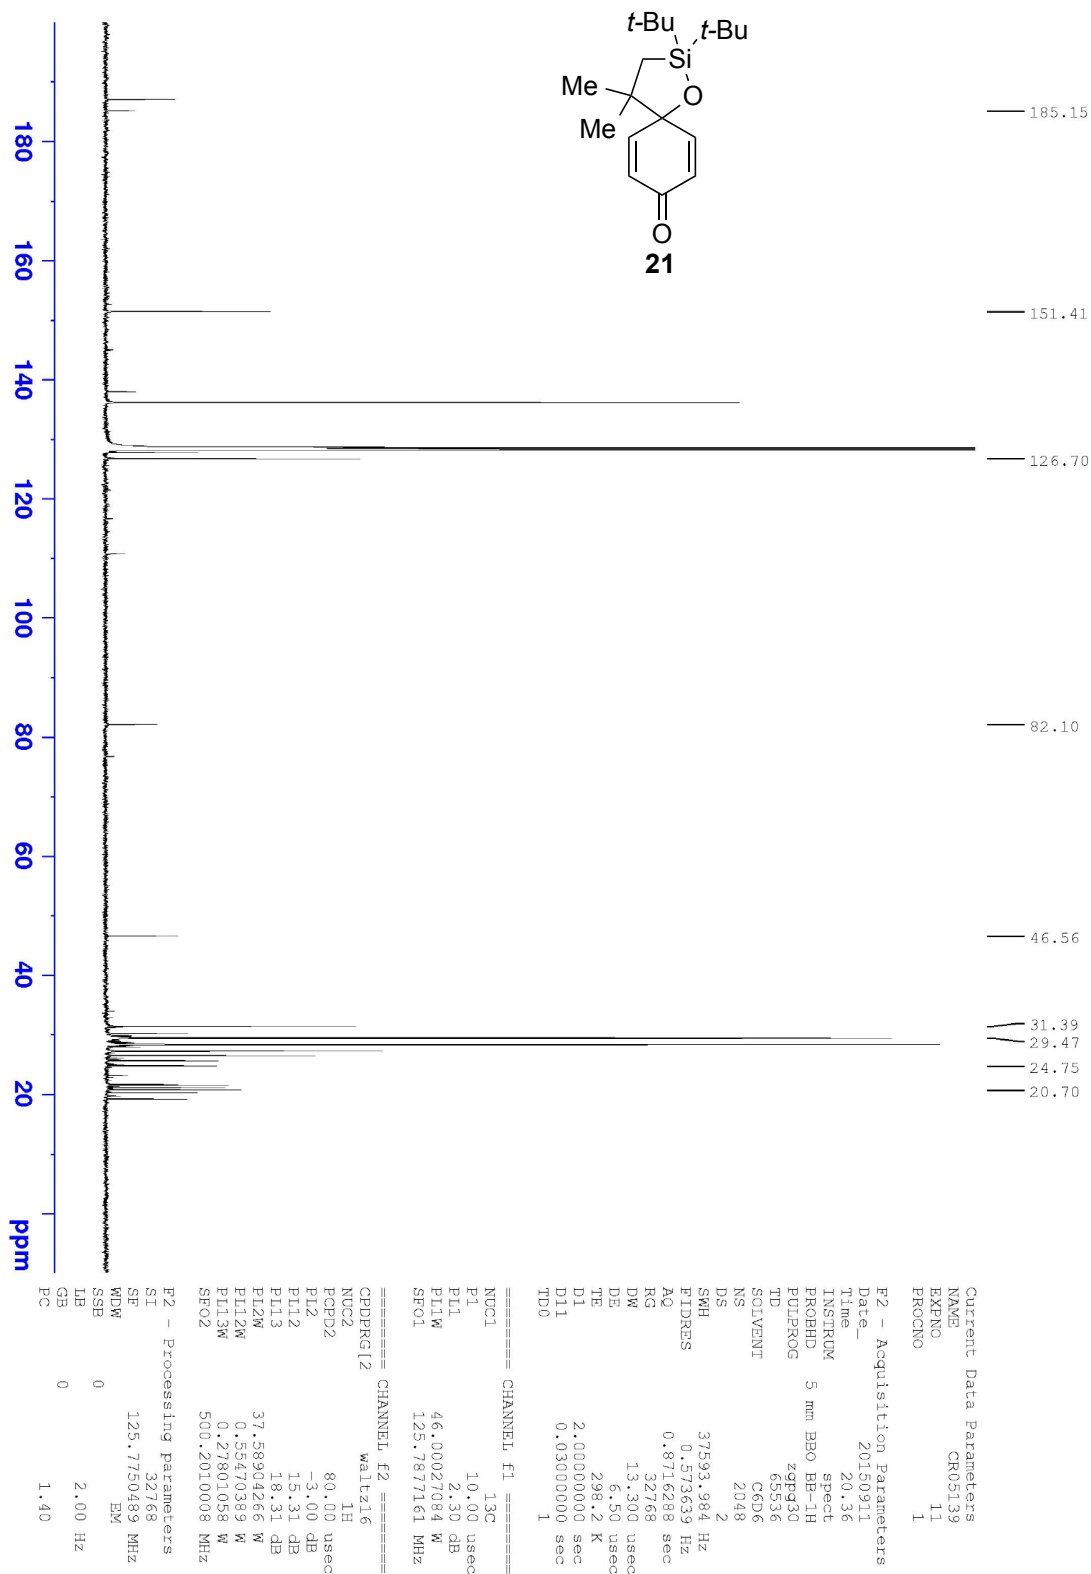

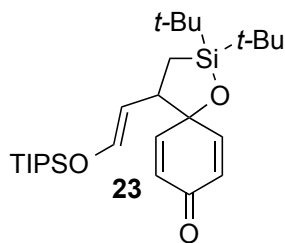

6.553  
6.547  
6.532  
6.526  
6.393  
6.387  
6.373  
6.367  
6.273  
6.249  
6.154  
6.150  
6.134  
6.130  
6.108  
6.105  
6.088  
6.084  
4.785  
4.767  
4.762  
4.743

2.612  
2.598  
2.594  
2.586  
2.580  
2.572  
2.568  
2.554

1.062  
1.057  
0.977  
0.965  
0.755  
0.729  
0.726  
0.699

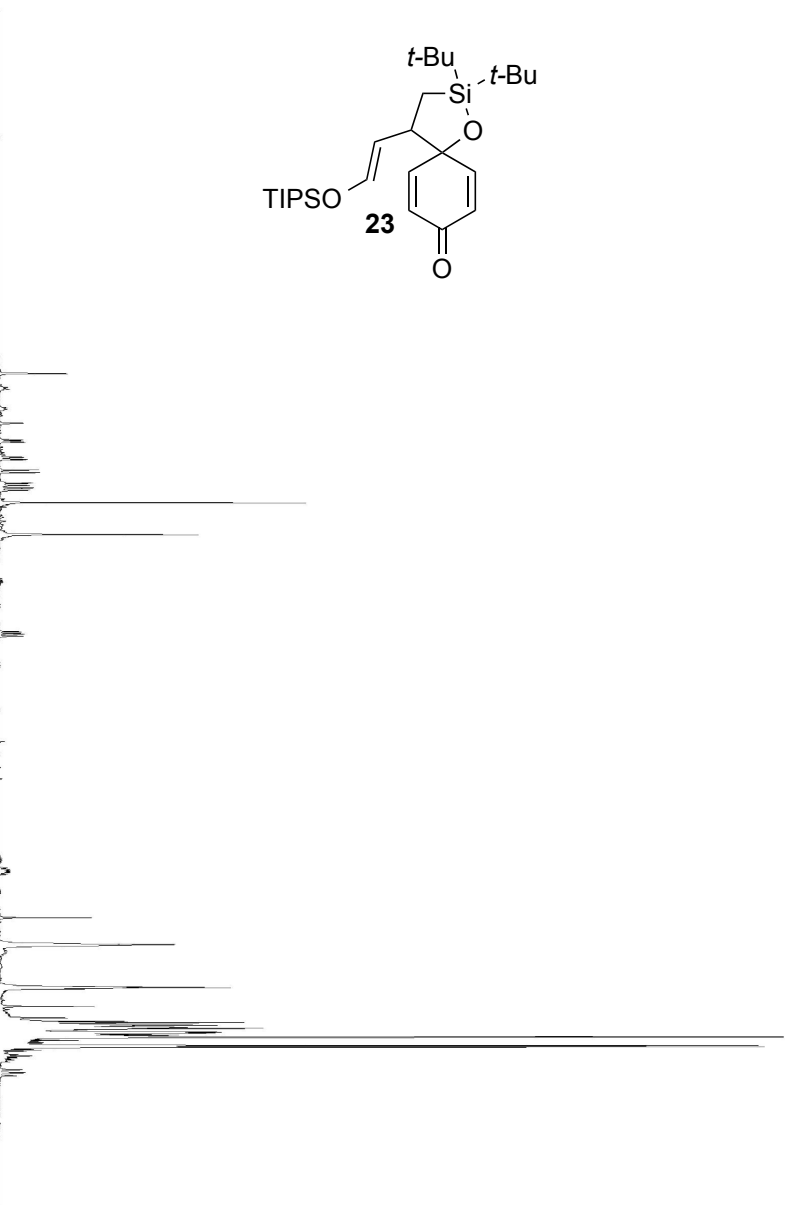

1.00  
0.98  
0.98  
1.18  
1.19

1.01

0.94

21.30  
10.13  
9.10  
1.16

ppm

```

Current Data Parameters
NAME          CR05130
EXPNO         3
PROCNO        1

F2 - Acquisition Parameters
Date_         20150419
Time          16.00
INSTRUM       spect
PROBHD        5 mm BBO BB-1H
PULPROG       zg30
TD            65536
SOLVENT       CDCl3
NS            1
DS            0
SWH           10330.578 Hz
FIDRES        0.157632 Hz
AQ            3.1719425 sec
RG            28.5
DW            48.400 usec
DE            6.50 usec
TE            298.2 K
D1            30.0000000 sec
TD0           1

===== CHANNEL f1 =====
NUC1           1H
P1            9.60 usec
PL1           -3.00 dB
PL1W          37.58904266 W
SFO1           500.2020889 MHz

F2 - Processing parameters
SI            32768
SF           500.198980 MHz
WDW           EM
SSB           0
LB            0.60 Hz
GB            0
PC            1.00
  
```

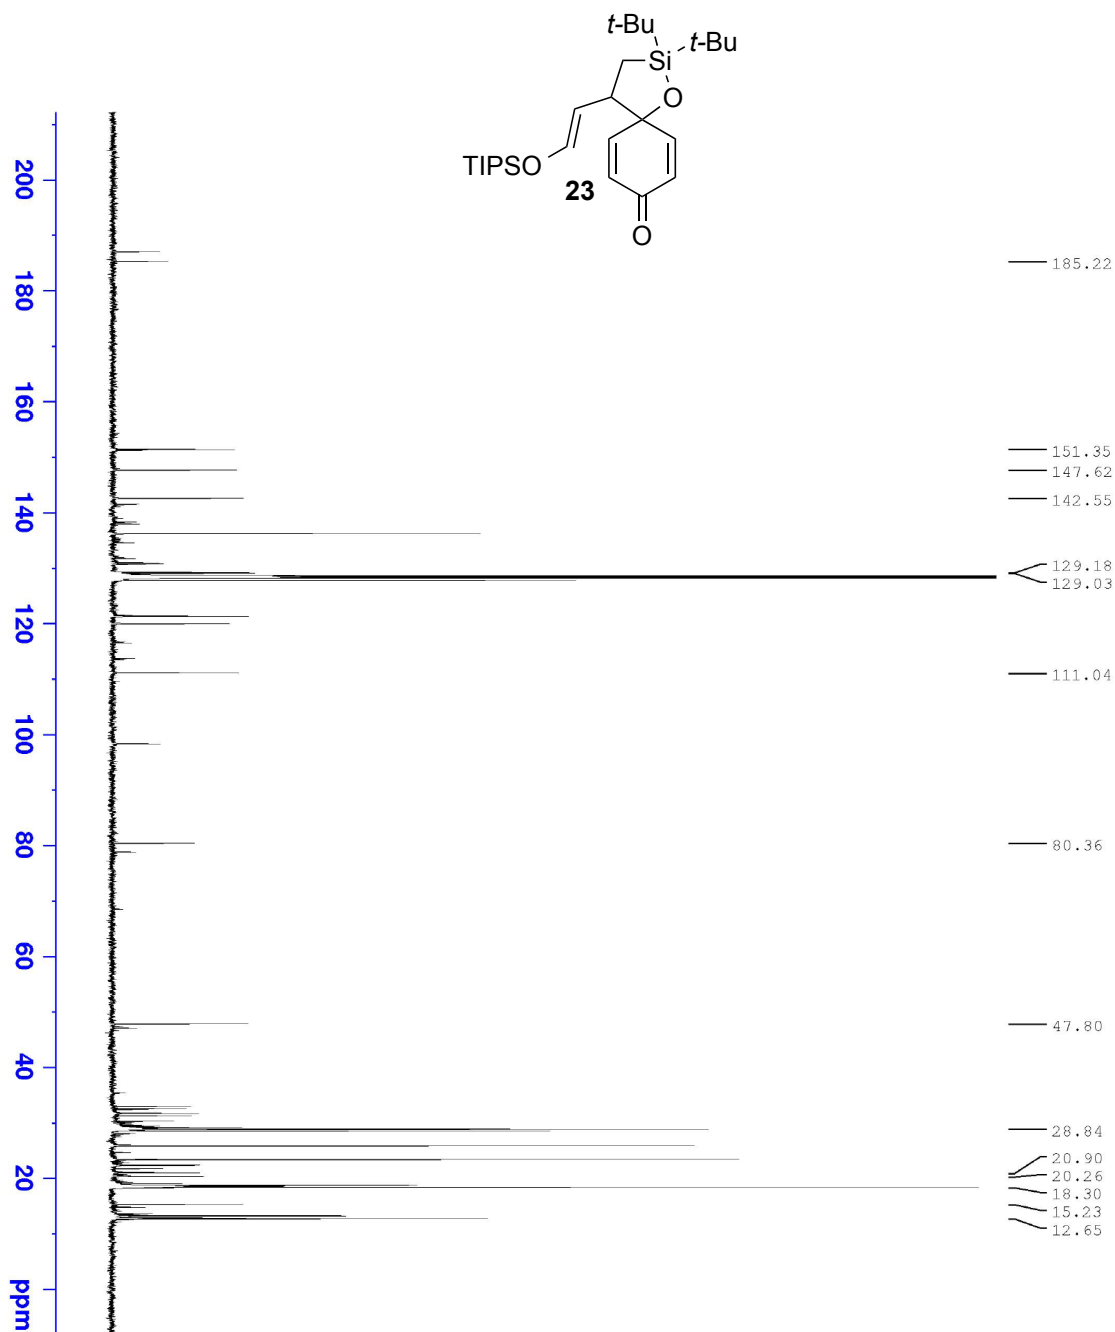

Current Data Parameters  
 NAME CR05130  
 EXPNO 5  
 PROCNO 1

F2 - Acquisition Parameters  
 Date\_ 20150419  
 Time 15.37  
 INSTRUM spect  
 PROBHD 5 mm BBO BB-1H  
 PULPROG zgpg30  
 TD 65536  
 SOLVENT C6D6  
 NS 512  
 DS 2  
 SWH 37593.984 Hz  
 FIDRES 0.57363 Hz  
 AQ 0.8716288 sec  
 RG 32768  
 DW 13.300 usec  
 DE 6.50 usec  
 TE 298.2 K  
 D1 2.00000000 sec  
 D11 0.03000000 sec  
 TDO 1

===== CHANNEL f1 =====  
 NUC1 <sup>13</sup>C  
 P1 10.00 usec  
 PL1 2.30 dB  
 PL1W 46.00027084 W  
 SFO1 125.7877161 MHz

===== CHANNEL f2 =====  
 CPDPRG12 waltz16  
 NUC2 <sup>1</sup>H  
 PCPD2 80.00 usec  
 PL2 -3.00 dB  
 PL12 15.31 dB  
 PL13 18.31 dB  
 PL2W 37.58904266 W  
 PL12W 0.55470389 W  
 PL13W 0.27801058 W  
 SFO2 500.2010008 MHz

F2 - Processing parameters  
 SI 32768  
 SF 125.7750463 MHz  
 WDW EM  
 SSB 0  
 LB 2.00 Hz  
 GB 0  
 PC 1.40

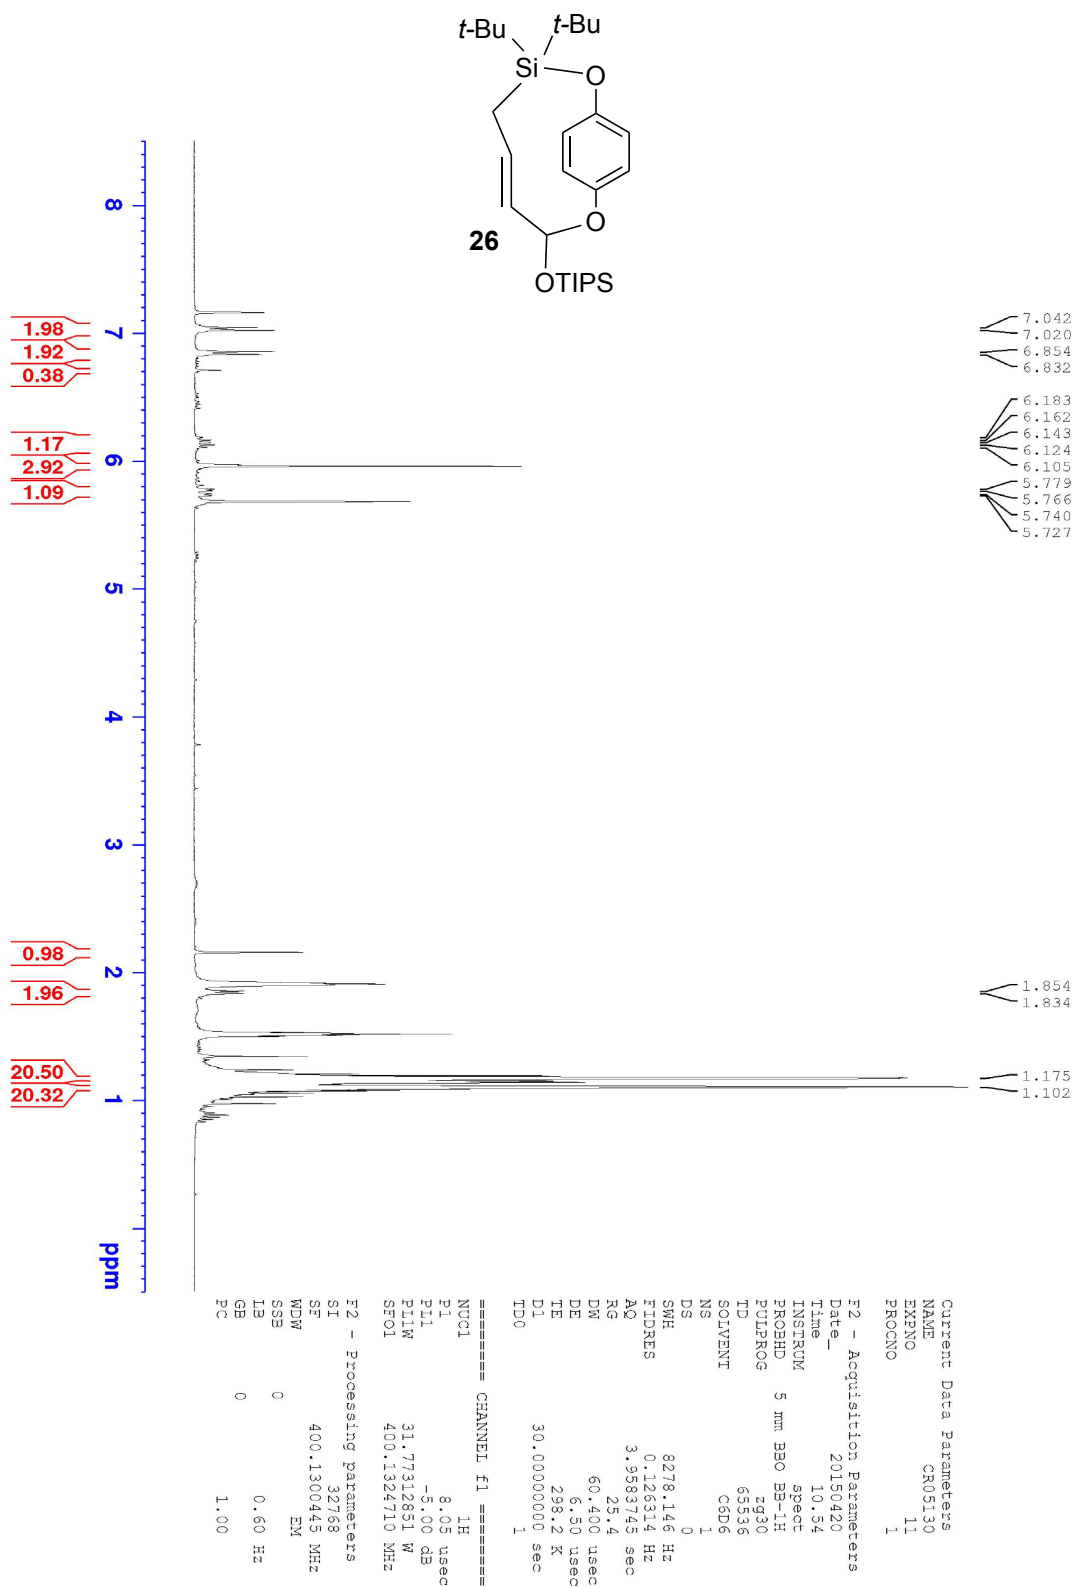

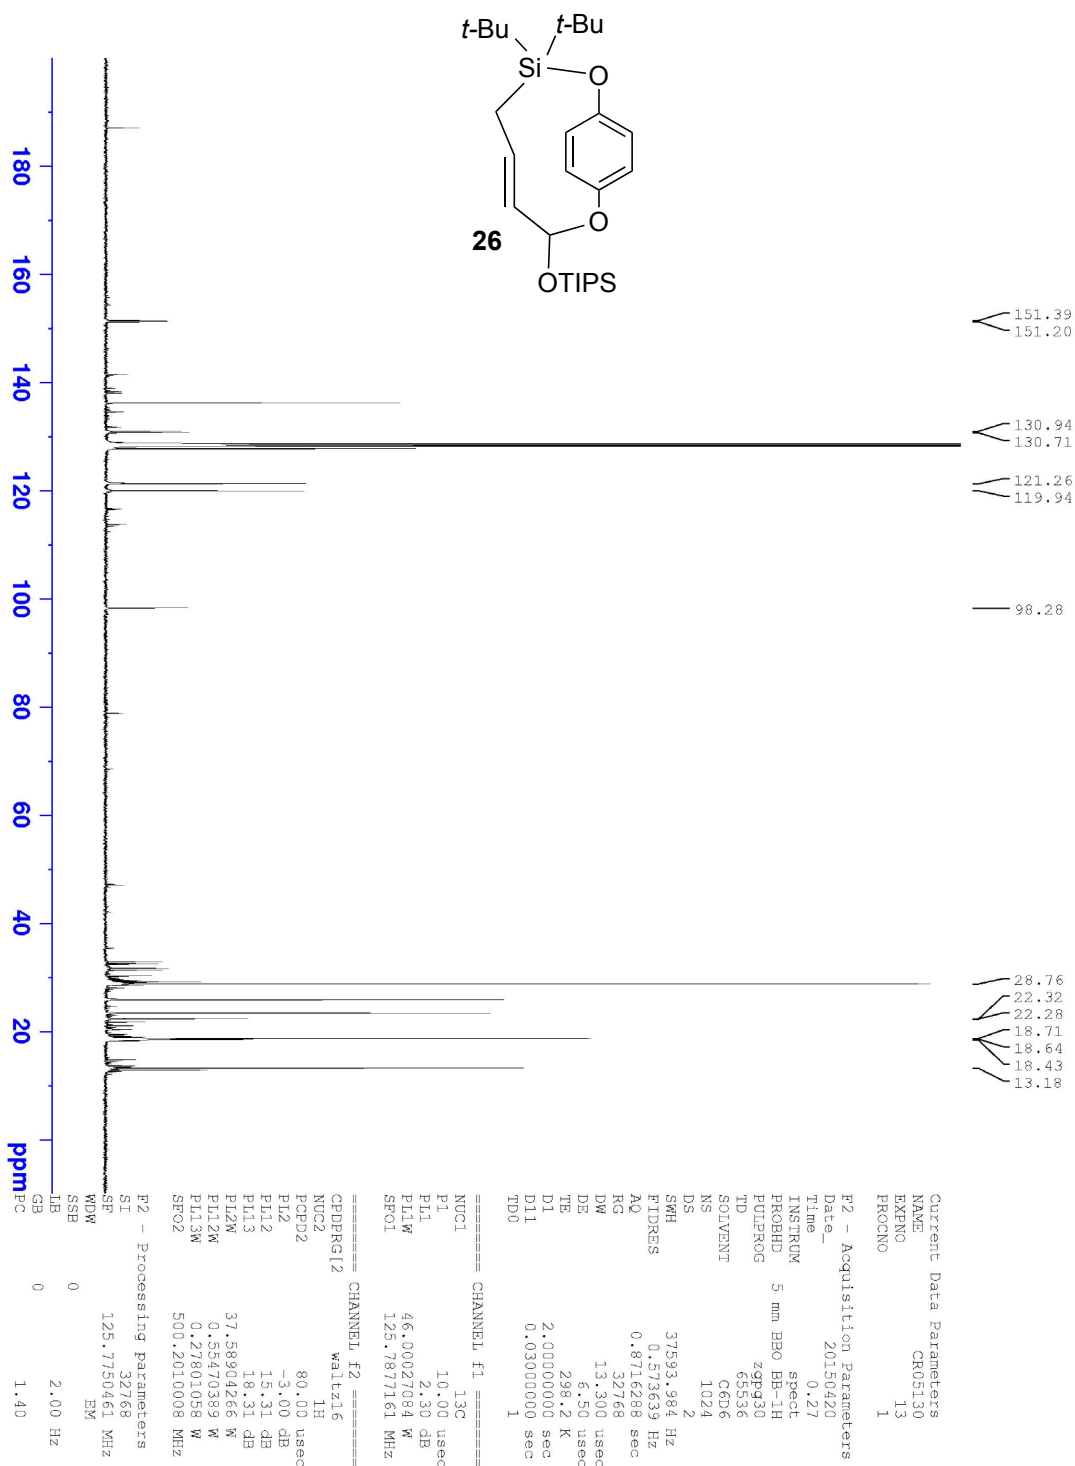



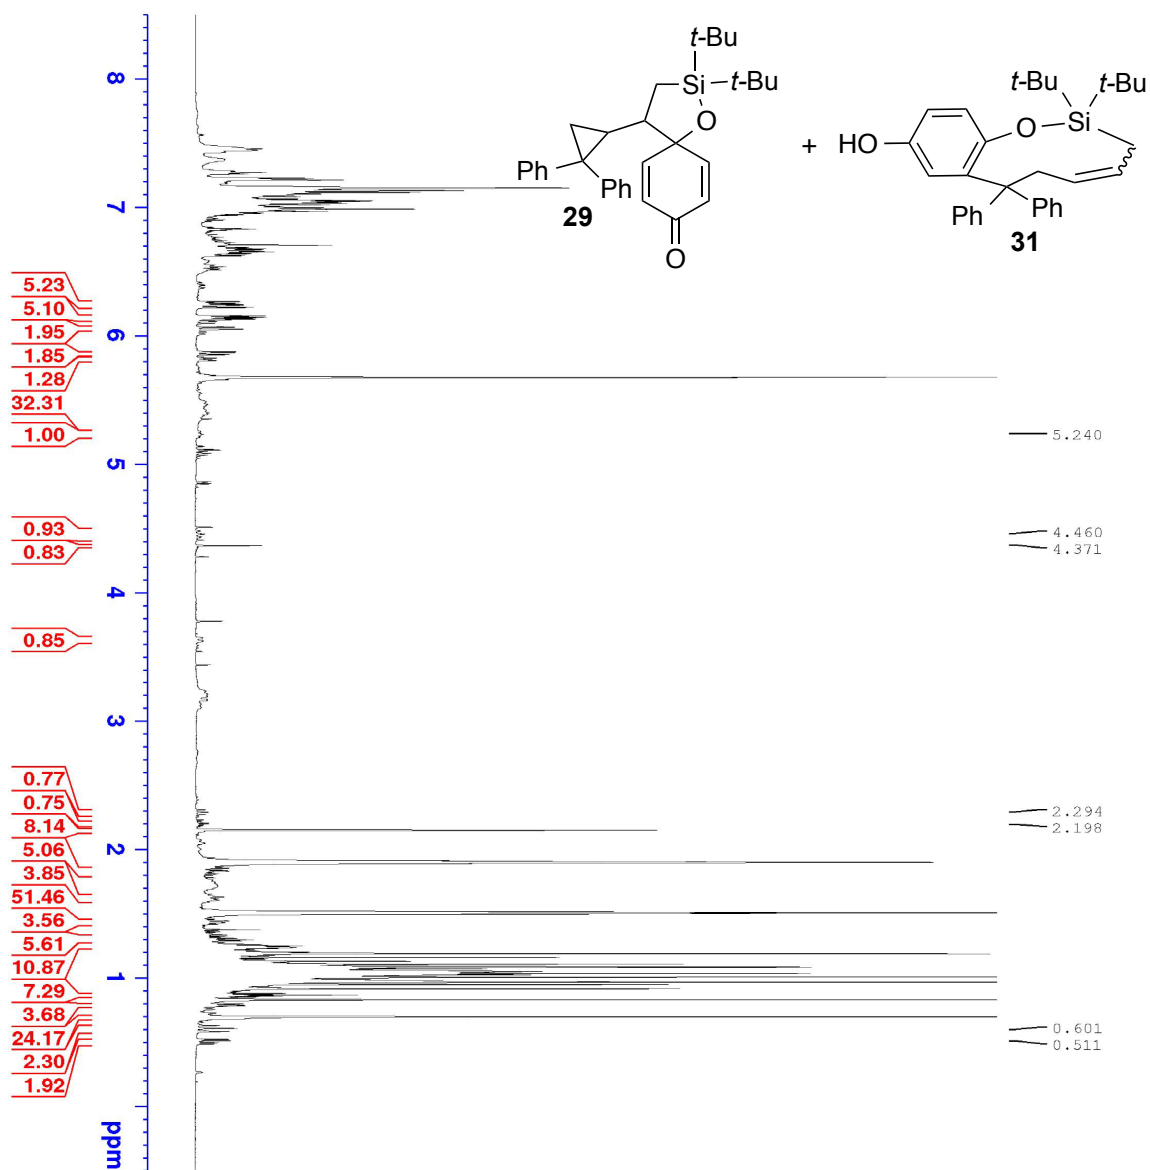

Current Data Parameters  
NAME CR05147  
EXPNO 1  
PROCNO 1

F2 - Acquisition Parameters  
Date\_ 20150825  
Time 19.35  
INSTRUM spect  
PROBHD 5 mm CP1CI 1H-  
PULPROG zg30  
TD 65536  
SOLVENT CDCl<sub>3</sub>  
NS 1  
DS 0  
SWH 12019.230 Hz  
FIDRES 0.183399 Hz  
AQ 2.7262976 sec  
RG 3.67  
DW 41.600 usec  
DE 28.00 usec  
TE 298.2 K  
D1 30.00000000 sec  
TD0 1

===== CHANNEL f1 =====  
SFO1 600.1937064 MHz  
NUC1 1H  
P1 8.00 usec  
P1M1 6.80000019 W

F2 - Processing parameters  
SI 65536  
SF 600.1900000 MHz  
WDW EM  
SSB 0  
LB 0.60 Hz  
GB 0  
PC 1.00

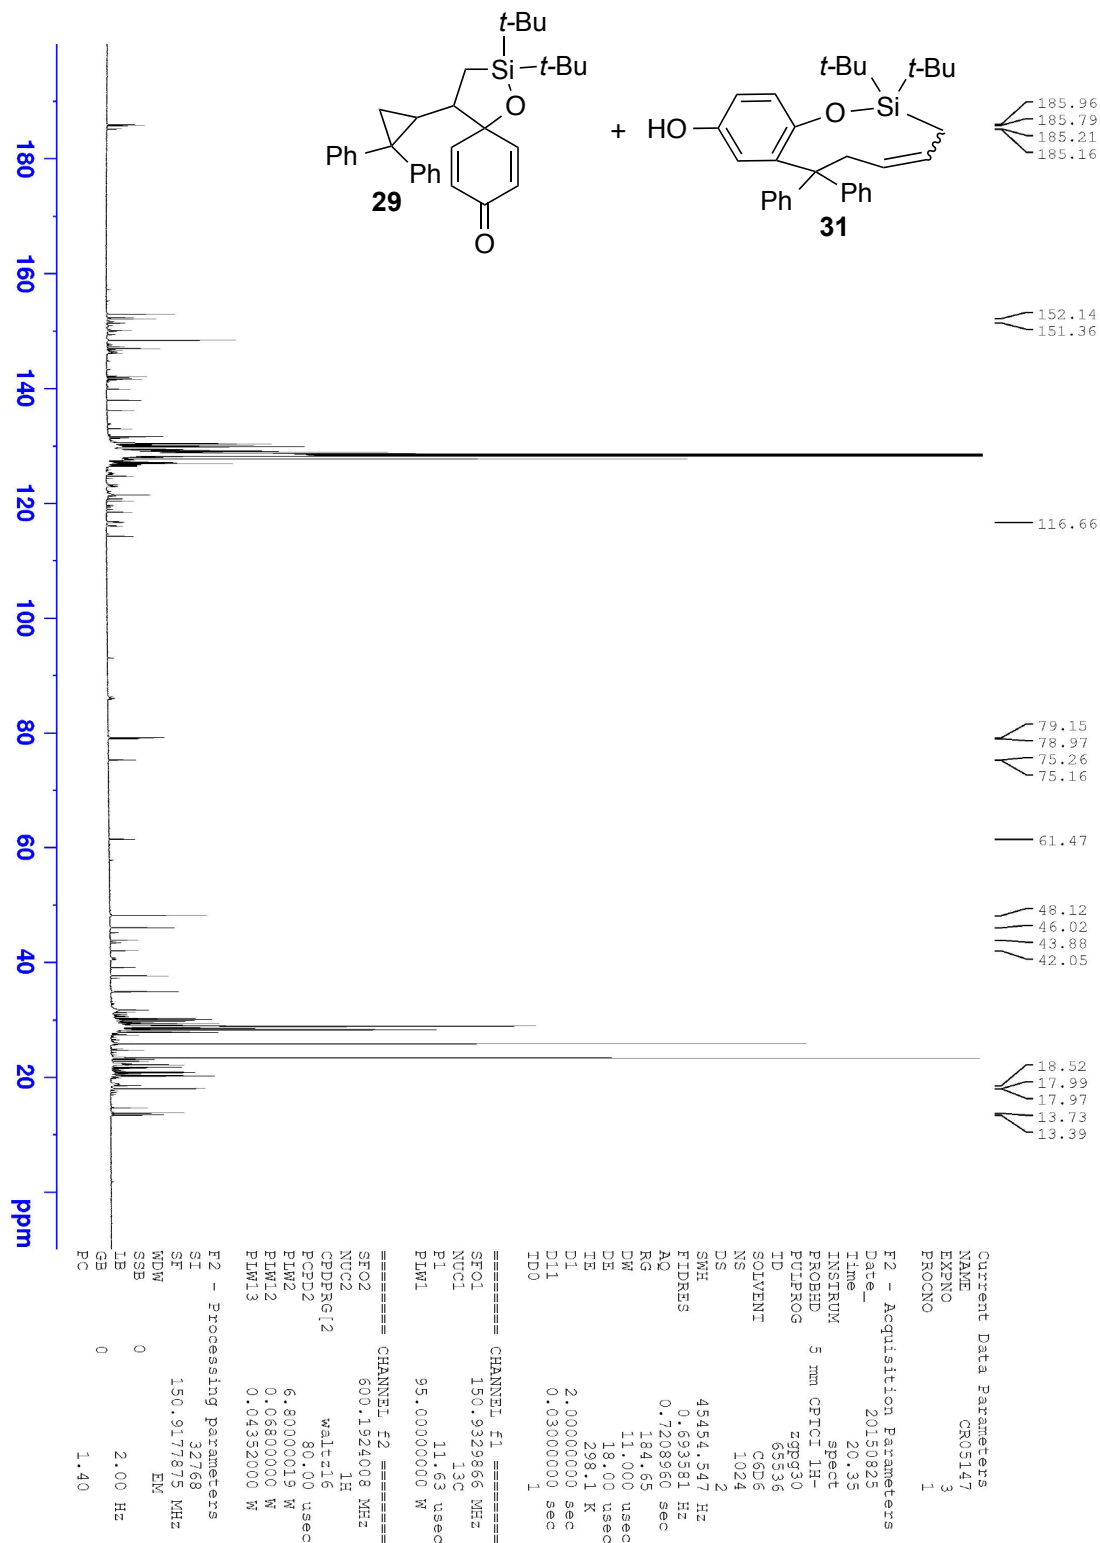

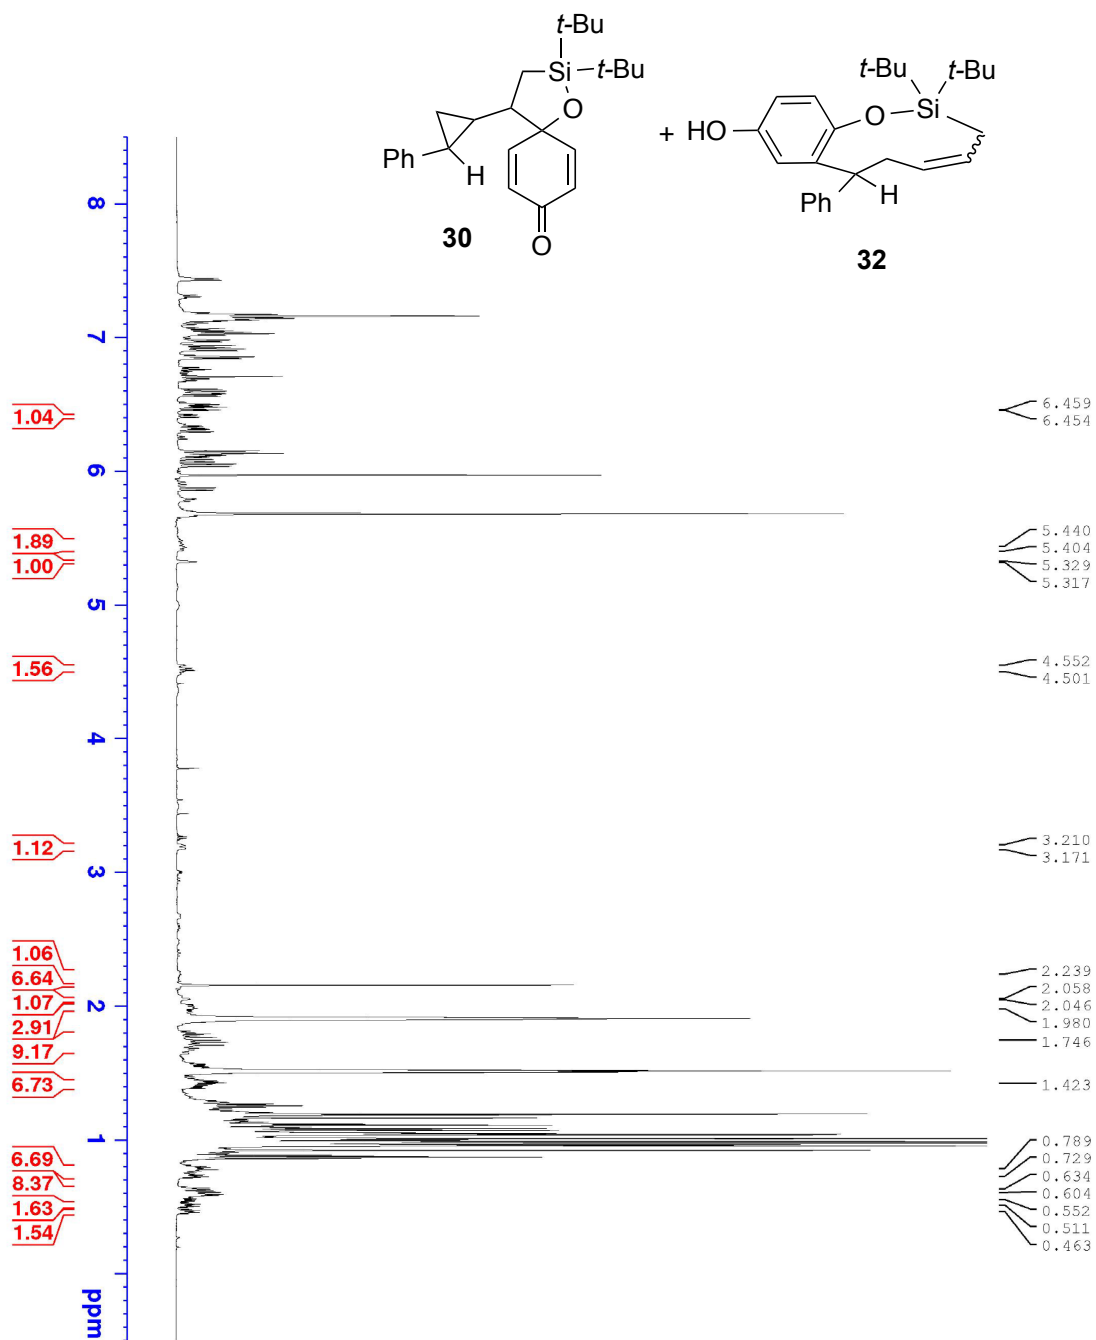

Current Data Parameters  
NAME CR05146  
EXPNO 5  
PROCNO 1

F2 - Acquisition Parameters  
Date\_ 20150825  
Time 16.03  
INSTRUM spect  
PROBHD 5 mm CPTCI 1H-  
PULPROG zg30  
ID 65336  
SOLVENT C6D6  
NS 1  
DS 0  
SWH 12019.230 Hz  
FIDRES 0.183399 Hz  
AQ 2.7262976 sec  
RG 4.12  
DW 41.600 usec  
DE 28.00 usec  
TE 298.1 K  
D1 30.00000000 sec  
ID0 1

===== CHANNEL f1 =====  
SFO1 600.137064 MHz  
NUC1 1H  
P1 8.00 usec  
PLW1 6.80000019 W

F2 - Processing parameters  
SI 65536  
SF 600.189945 MHz  
WDW EM  
SSB 0  
LB 0.60 Hz  
GB 0  
PC 1.00

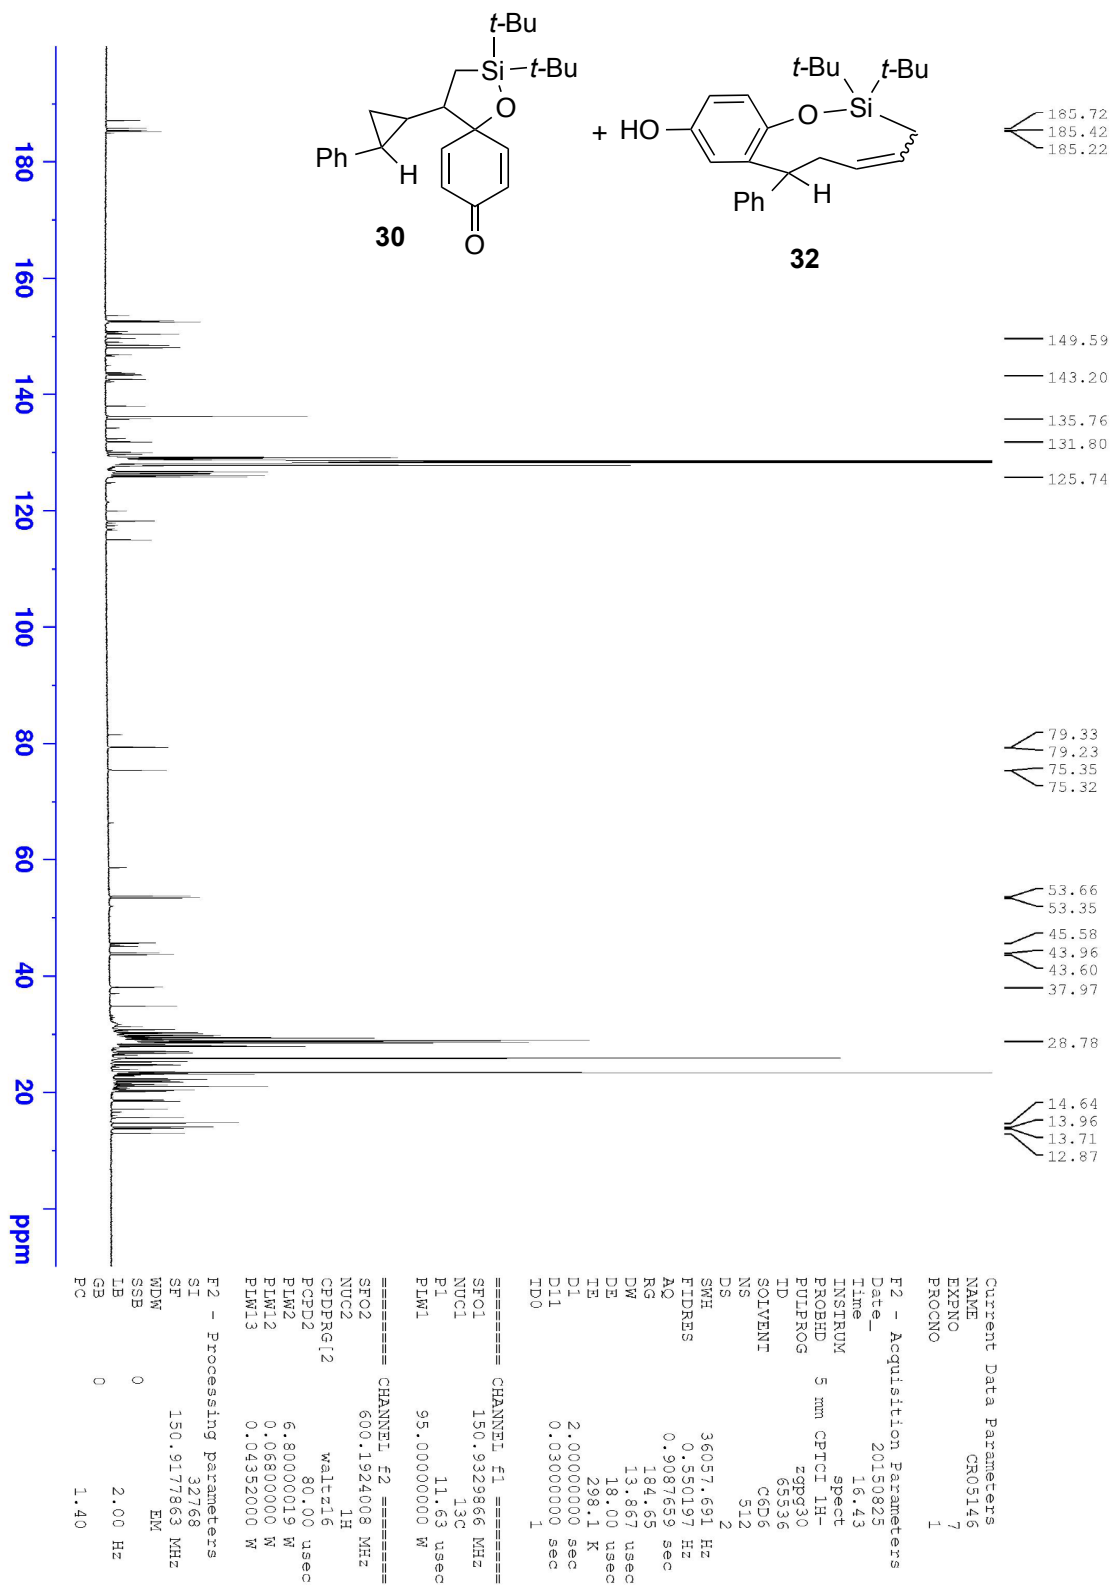

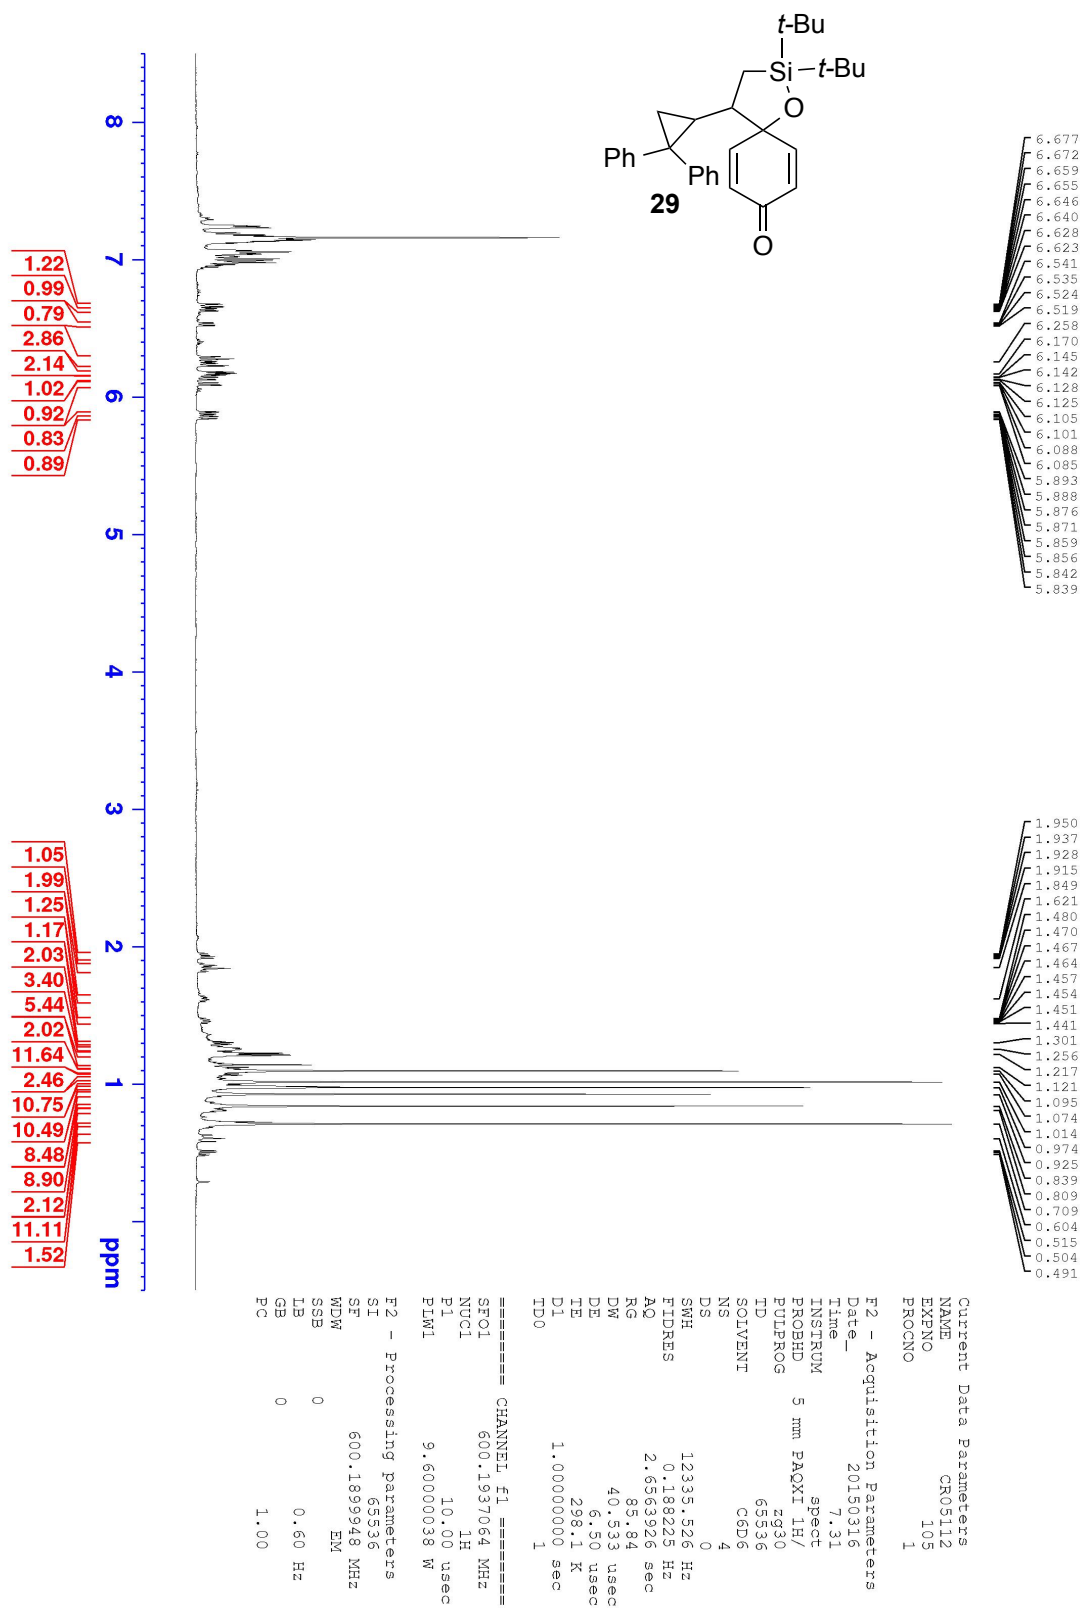

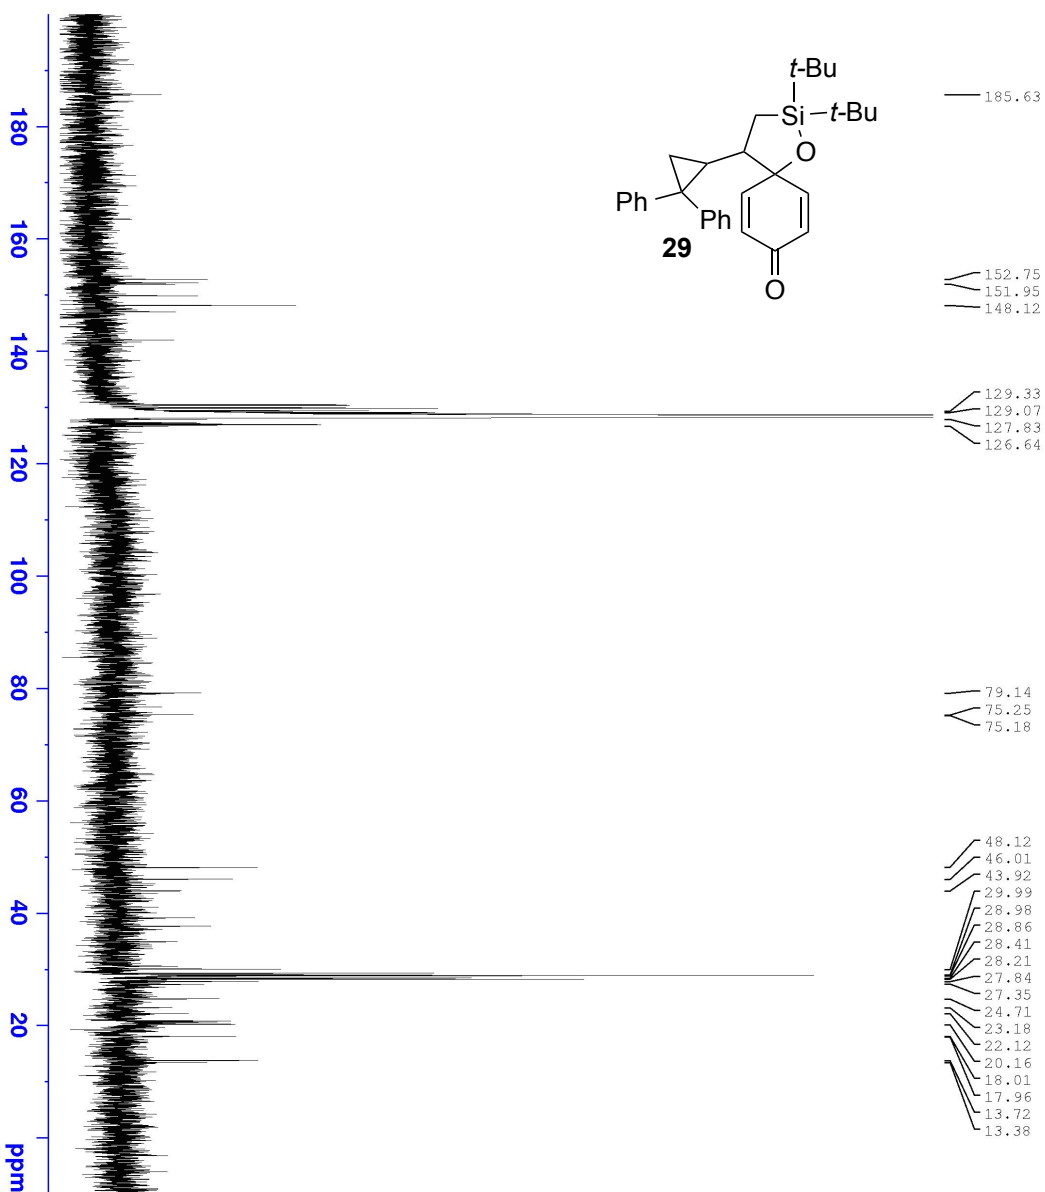

Current Data Parameters

|        |         |
|--------|---------|
| NAME   | CRO5112 |
| EXPNO  | 106     |
| PROCNO | 1       |

F2 - Acquisition Parameters

|         |               |
|---------|---------------|
| Date_   | 20150316      |
| Time    | 8.20          |
| INSTRUM | spect         |
| PROBHD  | 5 mm PAQXI1H/ |
| PULPROG | zgpg30        |
| TD      | 65336         |
| SOLVENT | CDCl3         |
| NS      | 1024          |
| DS      | 2             |
| SWH     | 45454.547 Hz  |
| FIDRES  | 0.693581 Hz   |
| AO      | 0.7208960 sec |
| RG      | 184.65        |
| DM      | 11.000 usec   |
| DE      | 6.50 usec     |
| TE      | 298.1 K       |
| D1      | 2.0000000 sec |
| TD0     | 1             |

===== CHANNEL f1 =====

|      |                 |
|------|-----------------|
| SFO1 | 150.9329873 MHz |
| NUC1 | 13C             |
| P1   | 15.00 usec      |
| PLW1 | 111.5000000 W   |

===== CHANNEL f2 =====

|          |                 |
|----------|-----------------|
| SFO2     | 600.1924008 MHz |
| NUC2     | 1H              |
| CPDPRG12 | waltz16         |
| PCPD2    | 70.00 usec      |
| PLW2     | 9.60000038 W    |
| PLW12    | 0.19582001 W    |
| PLW13    | 0.09600000 W    |

F2 - Processing parameters

|     |                 |
|-----|-----------------|
| SI  | 32768           |
| SF  | 150.9177889 MHz |
| WDW | EM              |
| SSB | 0               |
| LB  | 2.00 Hz         |
| GB  | 0               |
| PC  | 1.40            |

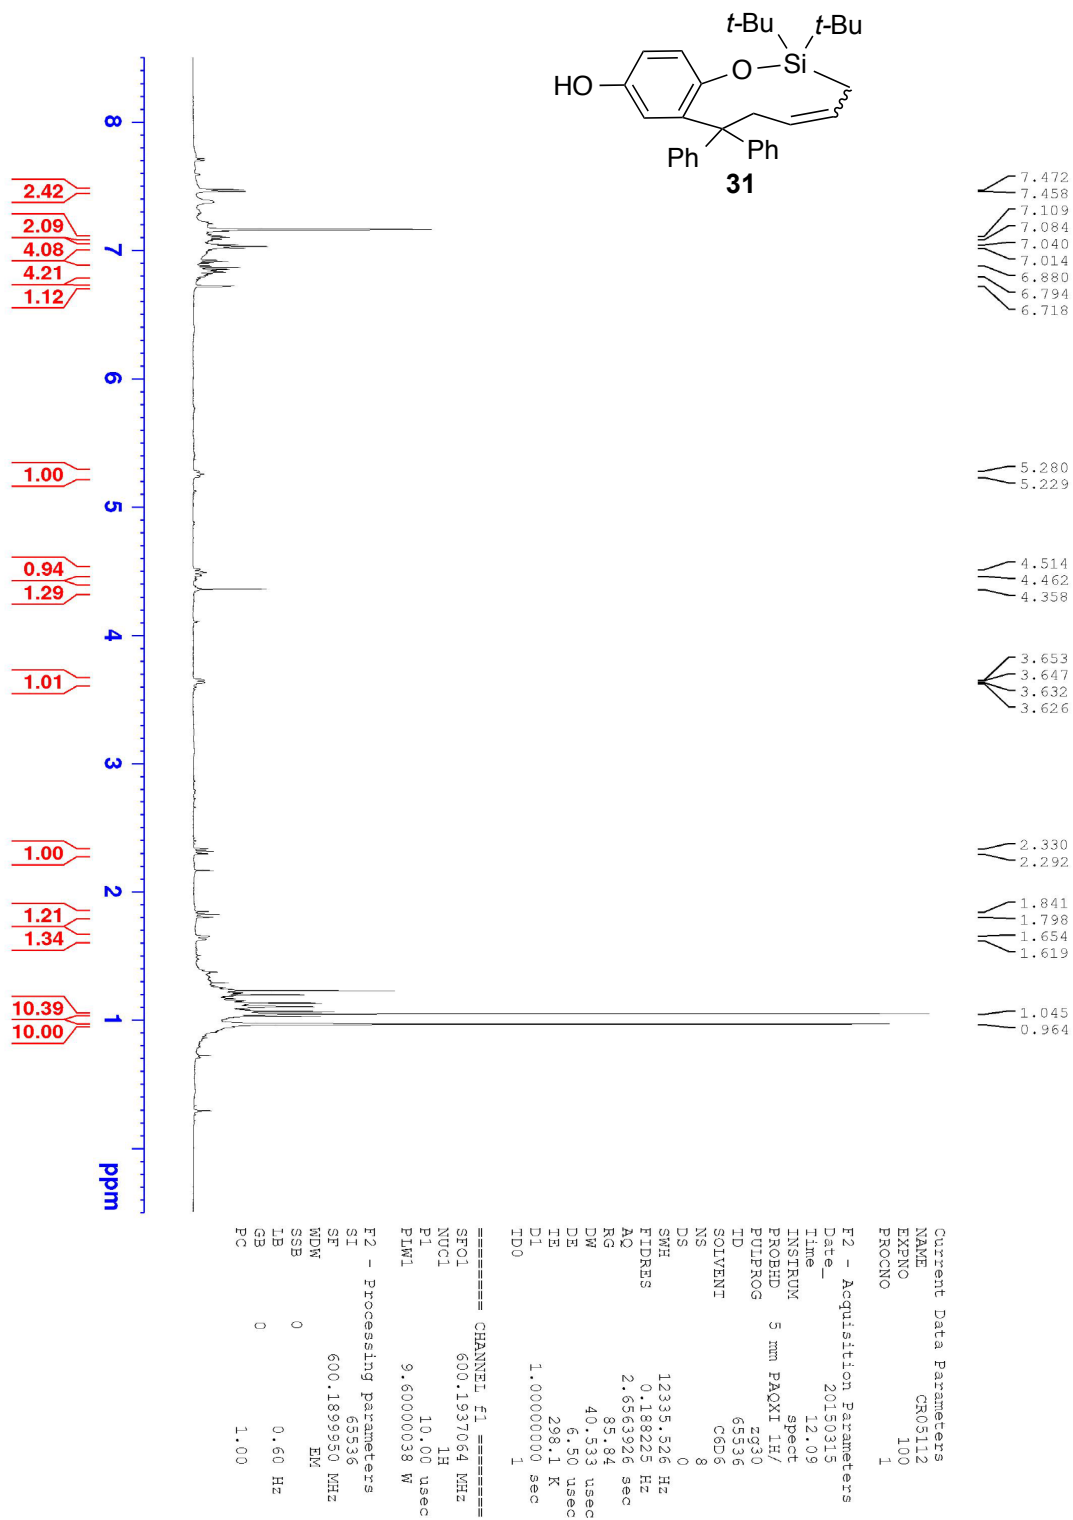

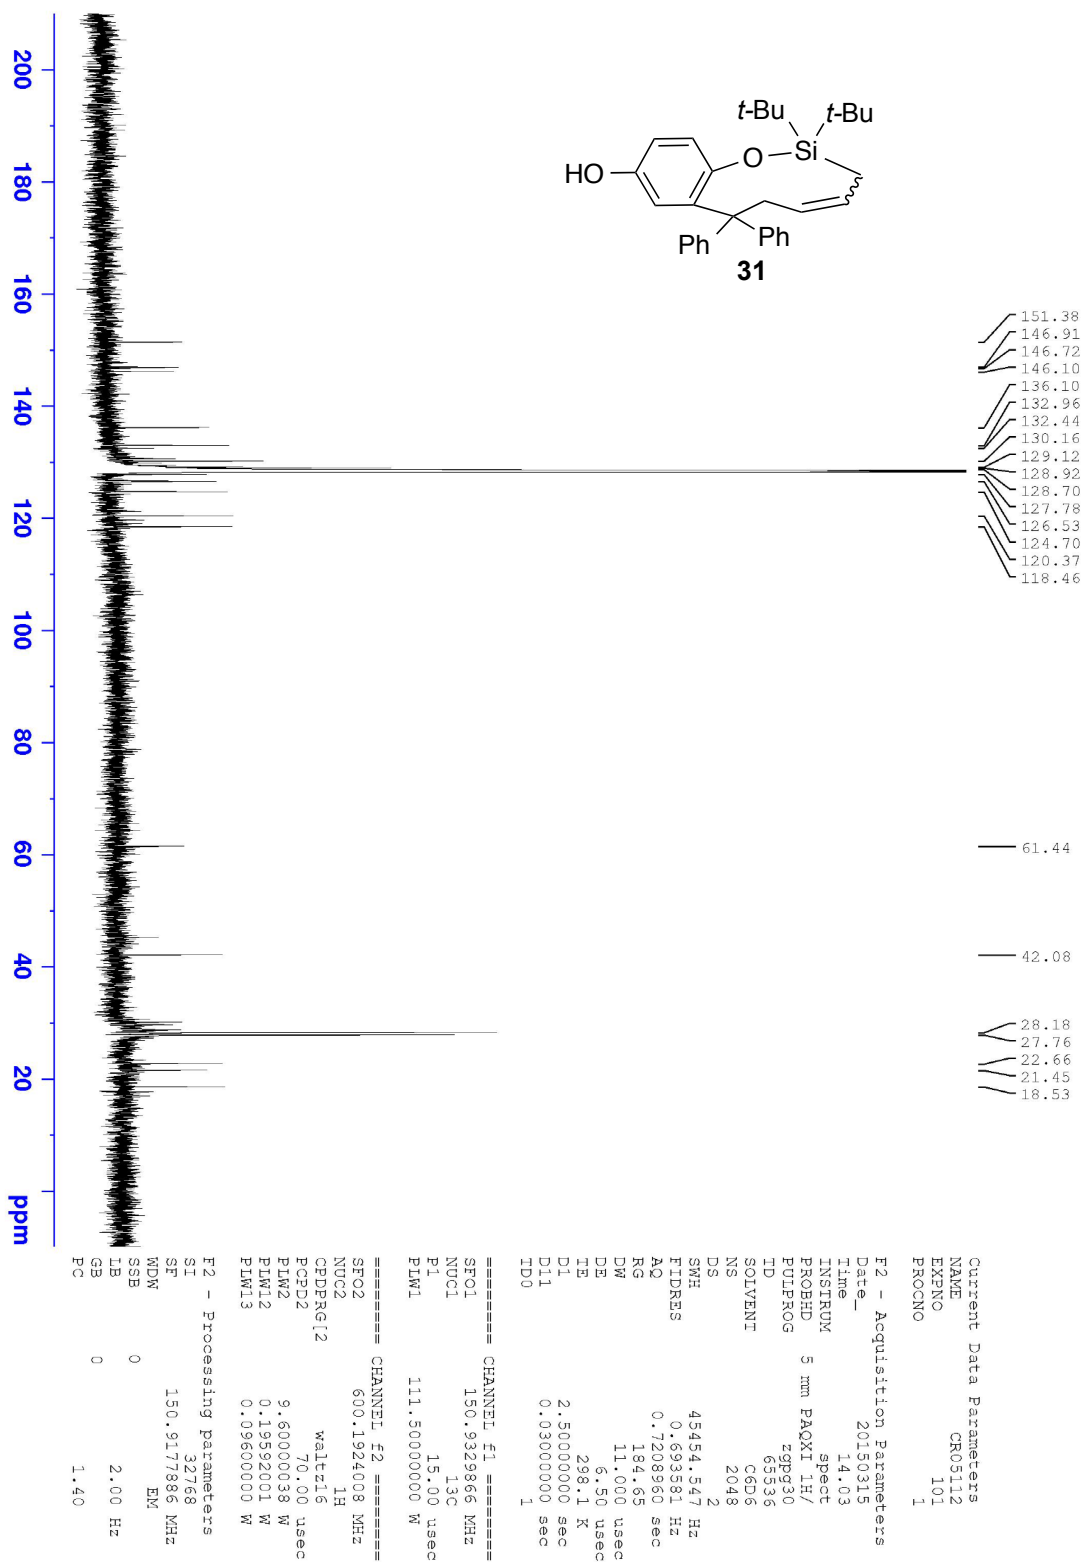



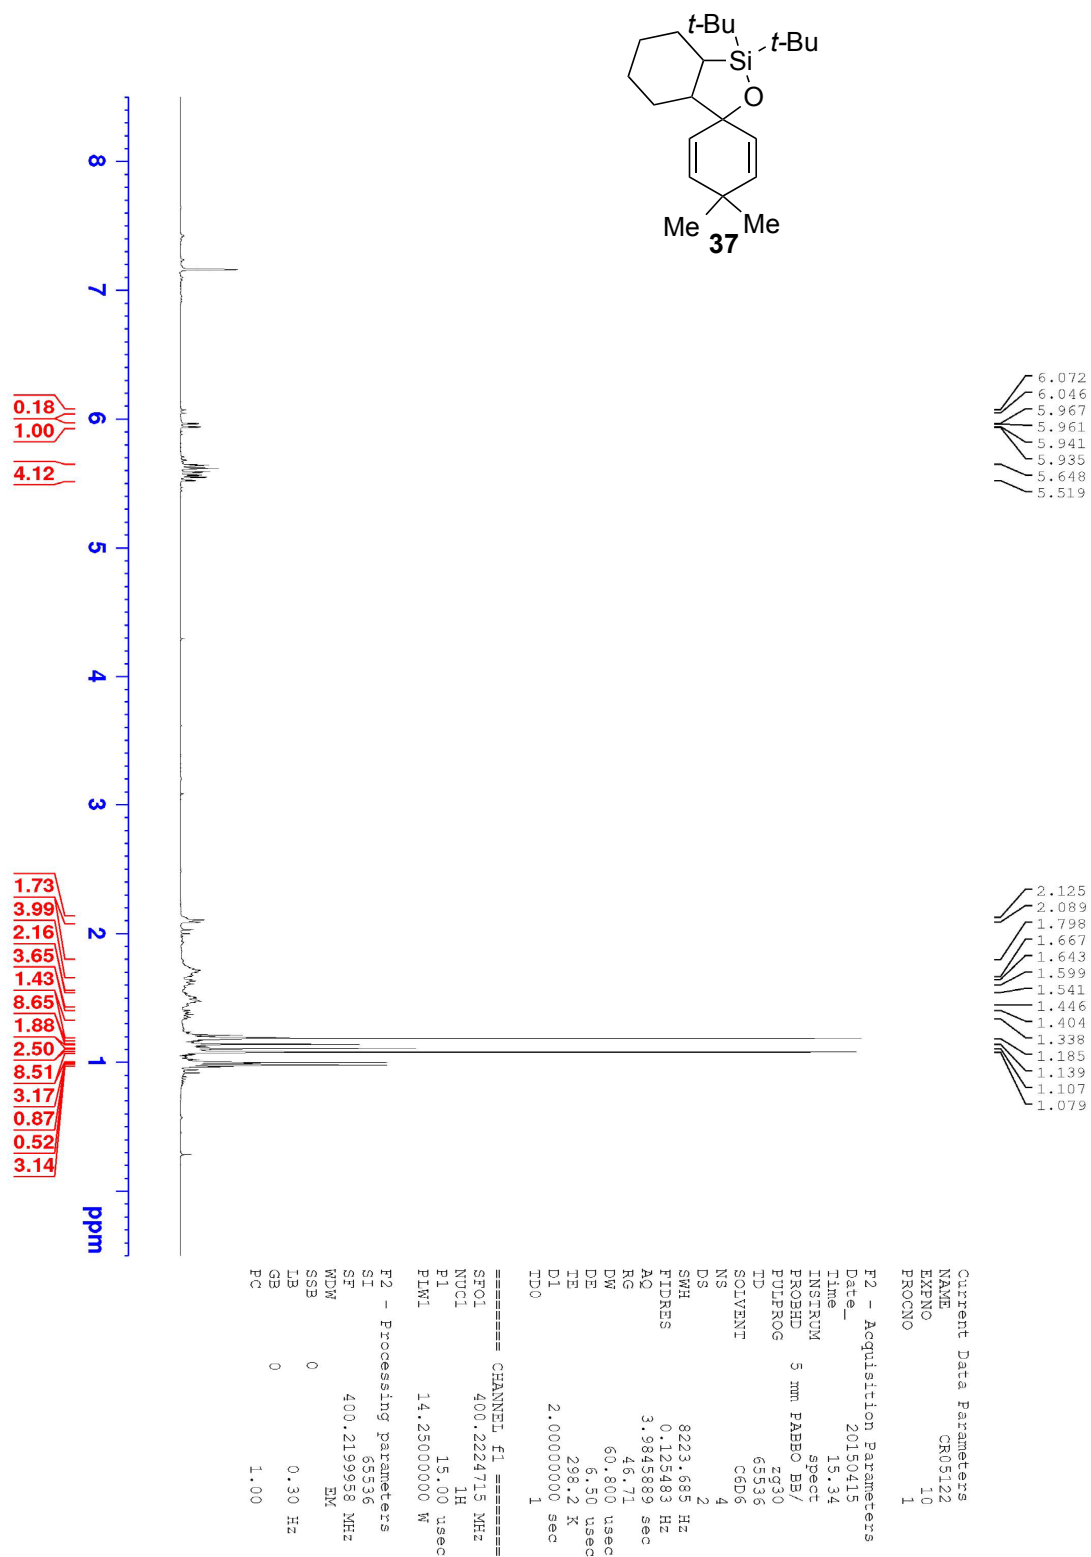

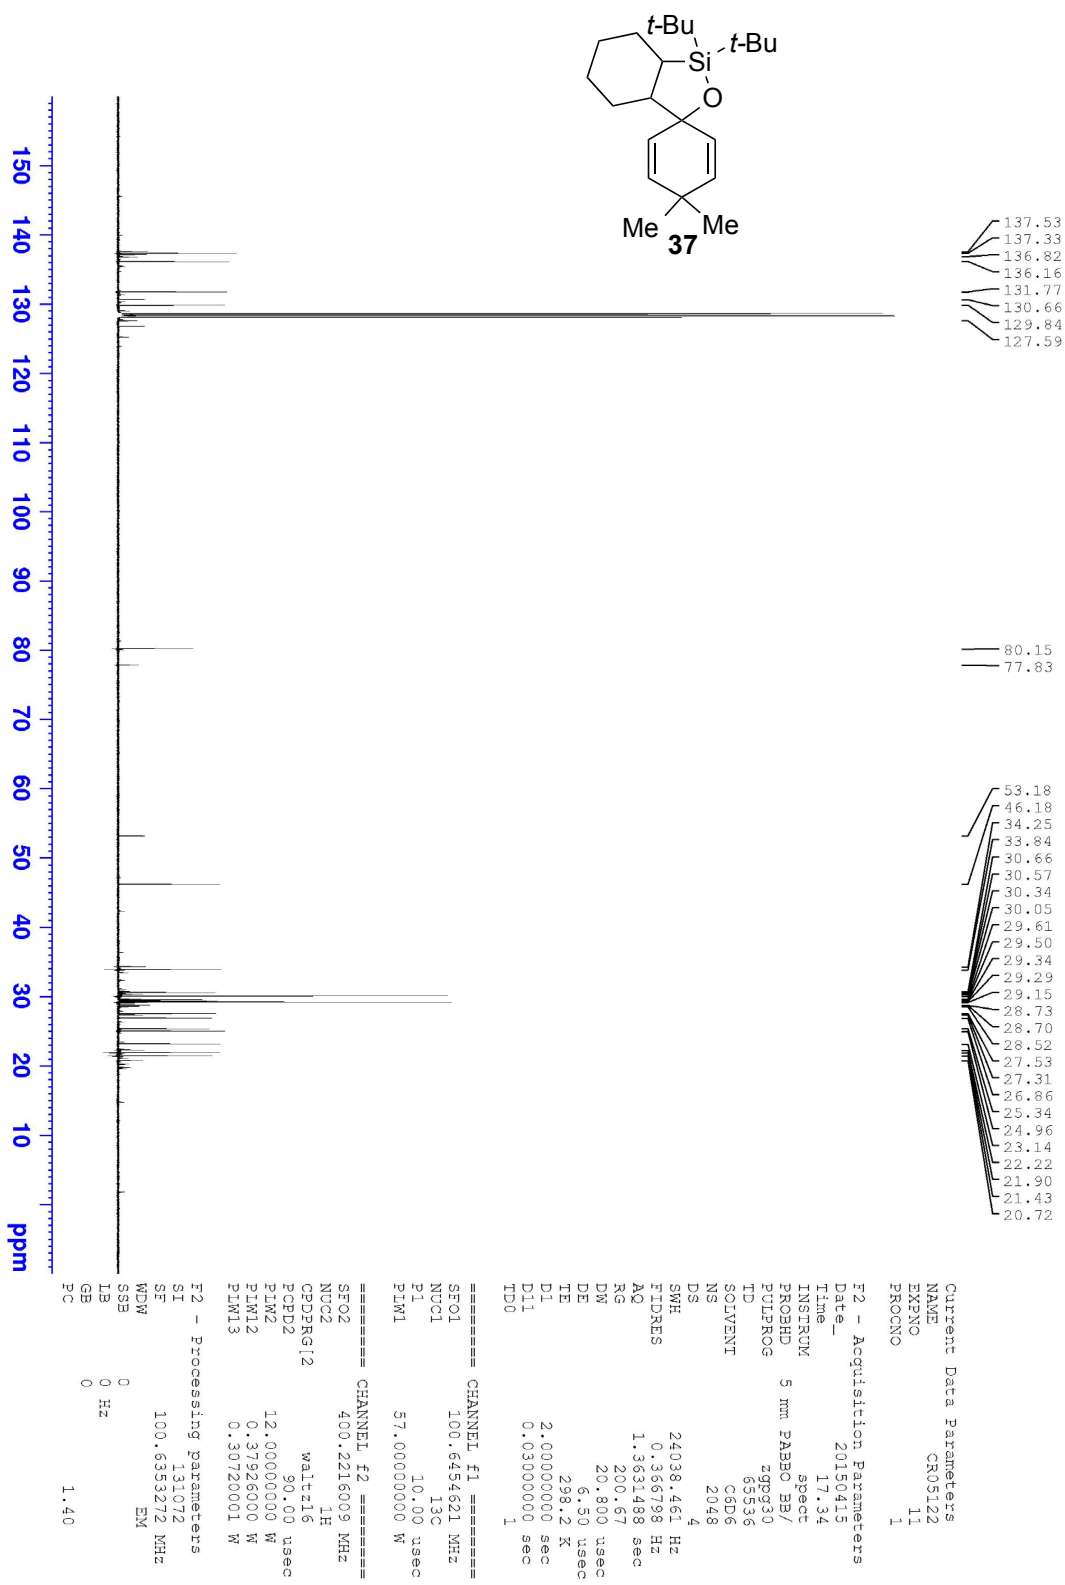

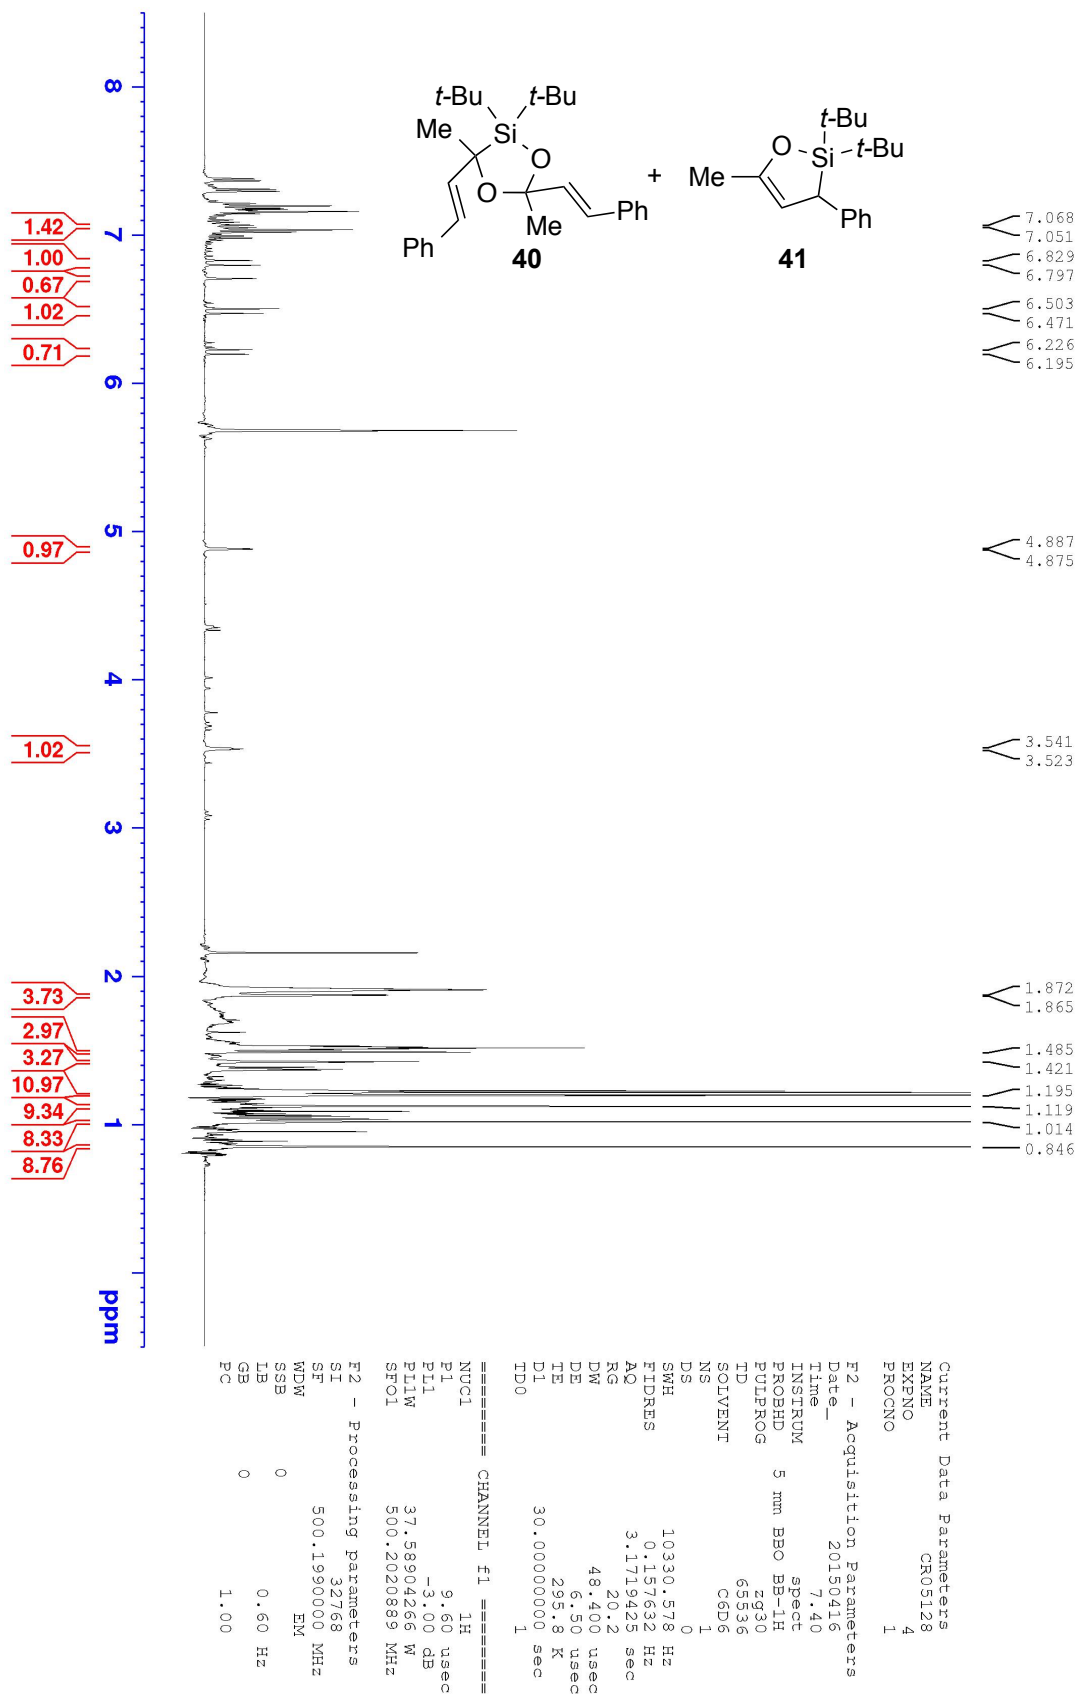

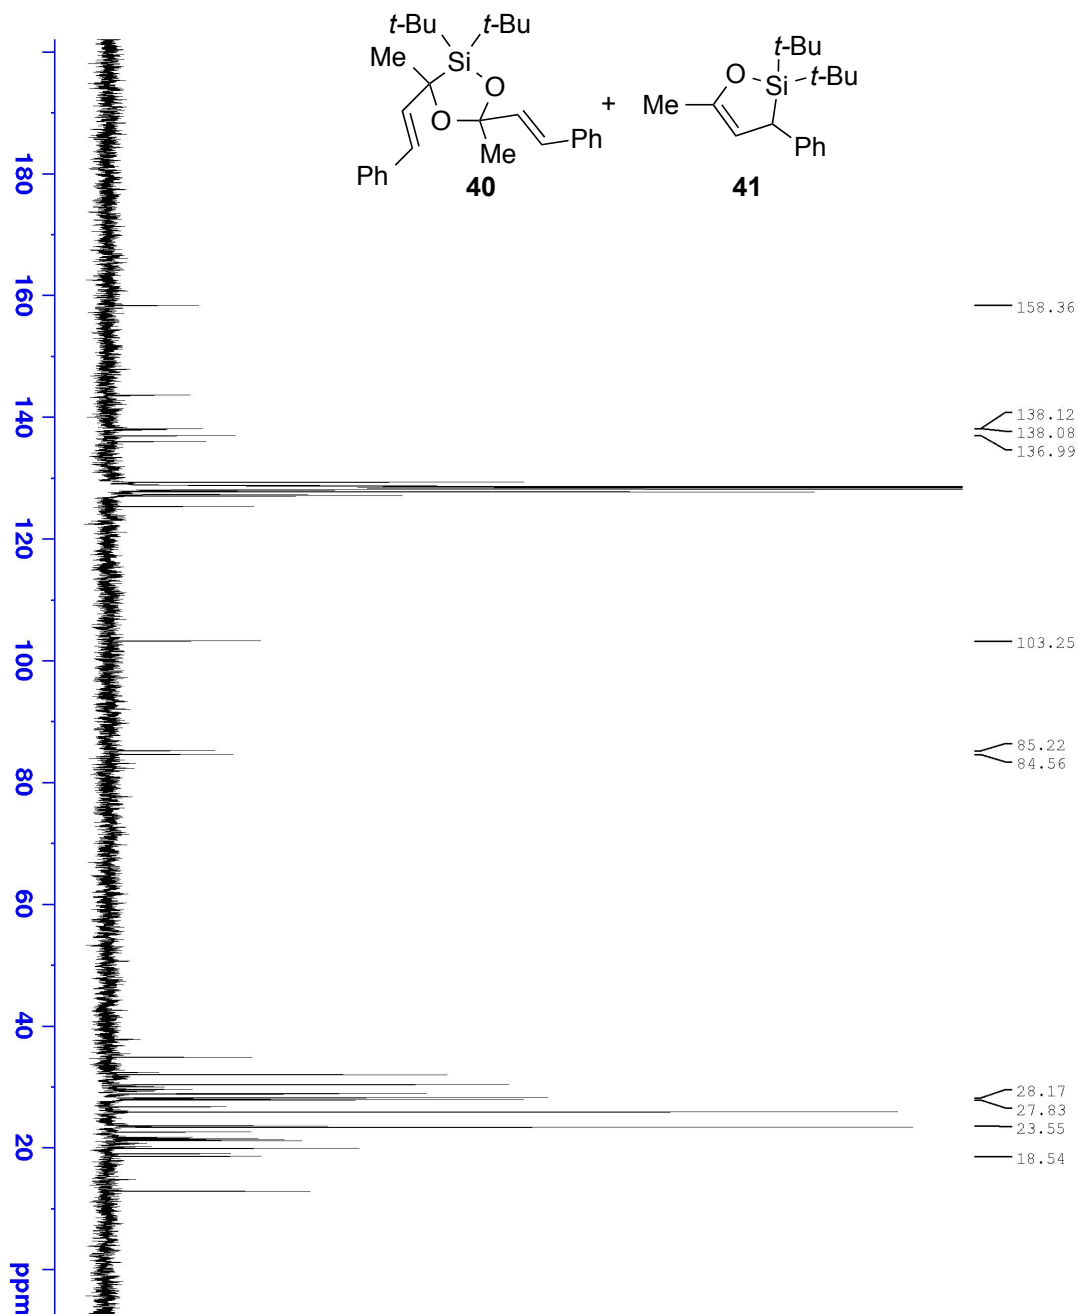

Current Data Parameters  
 NAME CR05128  
 EXPNO 6  
 PROCNO 1

F2 - Acquisition Parameters  
 Date\_ 20150416  
 Time 21.58  
 INSTRUM spect  
 PROBD 5 mm BBO BB-1H  
 PULPROG zgpg30  
 TD 65536  
 SOLVENT C6D6  
 NS 2048  
 DS 2  
 SWH 37593.984 Hz  
 FIDRES 0.573639 Hz  
 AQ 0.8716288 sec  
 RG 16384  
 DW 13.300 usec  
 DE 6.50 usec  
 TE 297.4 K  
 D1 2.00000000 sec  
 D11 0.03000000 sec  
 TD0 1

===== CHANNEL f1 =====  
 NUC1 13C  
 P1 10.00 usec  
 PL1 2.30 dB  
 PL1W 46.00027084 W  
 SFO1 125.7877161 MHz

===== CHANNEL f2 =====  
 CPDPRG12 waltz16  
 NUC2 1H  
 PCPD2 80.00 usec  
 PL2 -3.00 dB  
 PL12 15.31 dB  
 PL13 18.31 dB  
 PL2W 37.58904266 W  
 PL12W 0.55470389 W  
 PL13W 0.27801058 W  
 SFO2 500.2010008 MHz

F2 - Processing parameters  
 SI 32768  
 SF 125.7750457 MHz  
 WDW EM  
 SSB 0  
 GB 2.00 Hz  
 PC 1.40
